# Supplementary material for: A new mass spectral library for high-coverage and reproducible analysis of the Plasmodium falciparum–infected red blood cell proteome
Source: PubMed Central journal article supplement (PMC8900498; doi:10.1093/gigascience/giac008), 2022-03-07
Supplement: giac008_giga-d-21-00227_original_submission.pdf [file giac008_giga-d-21-00227_original_submission.pdf]

# GigaScience

## A new mass spectral library for high-coverage and reproducible analysis of the Plasmodium falciparum-infected red blood cell proteome --Manuscript Draft--

|                                                      |                                                                                                                                                                                                                                                                                                                                                                                                                                                                                                                                                                                                                                                                                                                                                                                                                                                                                                                                                                                                                                                                                                                                                                                                                                                                                                                                                                                                                                                                                                                                                                                                                                                                                                                                                                                                                                                                                                                                                                                                                                                             |                       |
|------------------------------------------------------|-------------------------------------------------------------------------------------------------------------------------------------------------------------------------------------------------------------------------------------------------------------------------------------------------------------------------------------------------------------------------------------------------------------------------------------------------------------------------------------------------------------------------------------------------------------------------------------------------------------------------------------------------------------------------------------------------------------------------------------------------------------------------------------------------------------------------------------------------------------------------------------------------------------------------------------------------------------------------------------------------------------------------------------------------------------------------------------------------------------------------------------------------------------------------------------------------------------------------------------------------------------------------------------------------------------------------------------------------------------------------------------------------------------------------------------------------------------------------------------------------------------------------------------------------------------------------------------------------------------------------------------------------------------------------------------------------------------------------------------------------------------------------------------------------------------------------------------------------------------------------------------------------------------------------------------------------------------------------------------------------------------------------------------------------------------|-----------------------|
| <b>Manuscript Number:</b>                            | GIGA-D-21-00227                                                                                                                                                                                                                                                                                                                                                                                                                                                                                                                                                                                                                                                                                                                                                                                                                                                                                                                                                                                                                                                                                                                                                                                                                                                                                                                                                                                                                                                                                                                                                                                                                                                                                                                                                                                                                                                                                                                                                                                                                                             |                       |
| <b>Full Title:</b>                                   | A new mass spectral library for high-coverage and reproducible analysis of the Plasmodium falciparum-infected red blood cell proteome                                                                                                                                                                                                                                                                                                                                                                                                                                                                                                                                                                                                                                                                                                                                                                                                                                                                                                                                                                                                                                                                                                                                                                                                                                                                                                                                                                                                                                                                                                                                                                                                                                                                                                                                                                                                                                                                                                                       |                       |
| <b>Article Type:</b>                                 | Research                                                                                                                                                                                                                                                                                                                                                                                                                                                                                                                                                                                                                                                                                                                                                                                                                                                                                                                                                                                                                                                                                                                                                                                                                                                                                                                                                                                                                                                                                                                                                                                                                                                                                                                                                                                                                                                                                                                                                                                                                                                    |                       |
| <b>Funding Information:</b>                          | national health and medical research council (APP1128003)                                                                                                                                                                                                                                                                                                                                                                                                                                                                                                                                                                                                                                                                                                                                                                                                                                                                                                                                                                                                                                                                                                                                                                                                                                                                                                                                                                                                                                                                                                                                                                                                                                                                                                                                                                                                                                                                                                                                                                                                   | A/Prof Darren J Creek |
|                                                      | national health and medical research council (APP1160705)                                                                                                                                                                                                                                                                                                                                                                                                                                                                                                                                                                                                                                                                                                                                                                                                                                                                                                                                                                                                                                                                                                                                                                                                                                                                                                                                                                                                                                                                                                                                                                                                                                                                                                                                                                                                                                                                                                                                                                                                   | A/Prof Darren J Creek |
|                                                      | national health and medical research council (APP1148700)                                                                                                                                                                                                                                                                                                                                                                                                                                                                                                                                                                                                                                                                                                                                                                                                                                                                                                                                                                                                                                                                                                                                                                                                                                                                                                                                                                                                                                                                                                                                                                                                                                                                                                                                                                                                                                                                                                                                                                                                   | A/Prof Darren J Creek |
| <b>Abstract:</b>                                     | <p><b>Background:</b> Plasmodium falciparum causes the majority of malaria mortality worldwide, and the disease occurs during the asexual red blood cell (RBC) stage of infection. In the absence of an effective and available vaccine, and with increasing drug resistance, asexual RBC stage parasites are an important research focus. In recent years, mass spectrometry-based proteomics using Data Dependent Acquisition (DDA) has been extensively used to understand the biochemical processes within the parasite. However, DDA is problematic for the detection of low abundance proteins, proteome coverage, and has poor run-to-run reproducibility.</p> <p><b>Results:</b> Here, we present a comprehensive P. falciparum -infected RBC (iRBC) spectral library to measure the abundance of 44,449 peptides from 3,113 P. falciparum and 1,617 RBC proteins using a Data Independent Acquisition (DIA) mass spectrometric approach. The spectral library includes proteins expressed in the three morphologically distinct RBC stages (ring, trophozoite, schizont), the RBC compartment of trophozoite-iRBCs, and the cytosolic fraction from uninfected RBCs (uRBC). This spectral library contains 87% of all P. falciparum proteins that have previously been reported with protein-level evidence in blood stages, as well as 692 previously unidentified proteins. The P. falciparum spectral library was successfully applied to generate semi-quantitative proteomics datasets that characterise the three distinct asexual parasite stages in RBCs, and compare artemisinin resistant (Cam3.II R539T ) and sensitive (Cam3.II rev ) parasites.</p> <p><b>Conclusion :</b> A reproducible, high-coverage proteomics spectral library and analysis method has been generated for investigating sets of proteins expressed in the iRBC stage of P. falciparum malaria. This will provide a foundation for an improved understanding of parasite biology, pathogenesis, drug mechanisms and vaccine candidate discovery for malaria.</p> |                       |
| <b>Corresponding Author:</b>                         | Darren J Creek<br><br>AUSTRALIA                                                                                                                                                                                                                                                                                                                                                                                                                                                                                                                                                                                                                                                                                                                                                                                                                                                                                                                                                                                                                                                                                                                                                                                                                                                                                                                                                                                                                                                                                                                                                                                                                                                                                                                                                                                                                                                                                                                                                                                                                             |                       |
| <b>Corresponding Author Secondary Information:</b>   |                                                                                                                                                                                                                                                                                                                                                                                                                                                                                                                                                                                                                                                                                                                                                                                                                                                                                                                                                                                                                                                                                                                                                                                                                                                                                                                                                                                                                                                                                                                                                                                                                                                                                                                                                                                                                                                                                                                                                                                                                                                             |                       |
| <b>Corresponding Author's Institution:</b>           |                                                                                                                                                                                                                                                                                                                                                                                                                                                                                                                                                                                                                                                                                                                                                                                                                                                                                                                                                                                                                                                                                                                                                                                                                                                                                                                                                                                                                                                                                                                                                                                                                                                                                                                                                                                                                                                                                                                                                                                                                                                             |                       |
| <b>Corresponding Author's Secondary Institution:</b> |                                                                                                                                                                                                                                                                                                                                                                                                                                                                                                                                                                                                                                                                                                                                                                                                                                                                                                                                                                                                                                                                                                                                                                                                                                                                                                                                                                                                                                                                                                                                                                                                                                                                                                                                                                                                                                                                                                                                                                                                                                                             |                       |
| <b>First Author:</b>                                 | Ghizal Siddiqui                                                                                                                                                                                                                                                                                                                                                                                                                                                                                                                                                                                                                                                                                                                                                                                                                                                                                                                                                                                                                                                                                                                                                                                                                                                                                                                                                                                                                                                                                                                                                                                                                                                                                                                                                                                                                                                                                                                                                                                                                                             |                       |
| <b>First Author Secondary Information:</b>           |                                                                                                                                                                                                                                                                                                                                                                                                                                                                                                                                                                                                                                                                                                                                                                                                                                                                                                                                                                                                                                                                                                                                                                                                                                                                                                                                                                                                                                                                                                                                                                                                                                                                                                                                                                                                                                                                                                                                                                                                                                                             |                       |
| <b>Order of Authors:</b>                             | Ghizal Siddiqui                                                                                                                                                                                                                                                                                                                                                                                                                                                                                                                                                                                                                                                                                                                                                                                                                                                                                                                                                                                                                                                                                                                                                                                                                                                                                                                                                                                                                                                                                                                                                                                                                                                                                                                                                                                                                                                                                                                                                                                                                                             |                       |
|                                                      | Amanda De Paoli                                                                                                                                                                                                                                                                                                                                                                                                                                                                                                                                                                                                                                                                                                                                                                                                                                                                                                                                                                                                                                                                                                                                                                                                                                                                                                                                                                                                                                                                                                                                                                                                                                                                                                                                                                                                                                                                                                                                                                                                                                             |                       |

|                                                                                                                                                                                                                                                                                                                                                                                                                                                                                                                                     |                        |
|-------------------------------------------------------------------------------------------------------------------------------------------------------------------------------------------------------------------------------------------------------------------------------------------------------------------------------------------------------------------------------------------------------------------------------------------------------------------------------------------------------------------------------------|------------------------|
|                                                                                                                                                                                                                                                                                                                                                                                                                                                                                                                                     | Christopher A MacRaild |
|                                                                                                                                                                                                                                                                                                                                                                                                                                                                                                                                     | Anna E Sexton          |
|                                                                                                                                                                                                                                                                                                                                                                                                                                                                                                                                     | Coralie Boulet         |
|                                                                                                                                                                                                                                                                                                                                                                                                                                                                                                                                     | Anup D Shah            |
|                                                                                                                                                                                                                                                                                                                                                                                                                                                                                                                                     | Mitchell B Batty       |
|                                                                                                                                                                                                                                                                                                                                                                                                                                                                                                                                     | Ralf B Schittenhelm    |
|                                                                                                                                                                                                                                                                                                                                                                                                                                                                                                                                     | Teresa G Carvalho      |
|                                                                                                                                                                                                                                                                                                                                                                                                                                                                                                                                     | Darren J Creek         |
| <b>Order of Authors Secondary Information:</b>                                                                                                                                                                                                                                                                                                                                                                                                                                                                                      |                        |
| <b>Additional Information:</b>                                                                                                                                                                                                                                                                                                                                                                                                                                                                                                      |                        |
| <b>Question</b>                                                                                                                                                                                                                                                                                                                                                                                                                                                                                                                     | <b>Response</b>        |
| Are you submitting this manuscript to a special series or article collection?                                                                                                                                                                                                                                                                                                                                                                                                                                                       | No                     |
| <p><b>Experimental design and statistics</b></p> <p>Full details of the experimental design and statistical methods used should be given in the Methods section, as detailed in our <a href="#">Minimum Standards Reporting Checklist</a>. Information essential to interpreting the data presented should be made available in the figure legends.</p> <p>Have you included all the information requested in your manuscript?</p>                                                                                                  | Yes                    |
| <p><b>Resources</b></p> <p>A description of all resources used, including antibodies, cell lines, animals and software tools, with enough information to allow them to be uniquely identified, should be included in the Methods section. Authors are strongly encouraged to cite <a href="#">Research Resource Identifiers</a> (RRIDs) for antibodies, model organisms and tools, where possible.</p> <p>Have you included the information requested as detailed in our <a href="#">Minimum Standards Reporting Checklist</a>?</p> | Yes                    |
| <b>Availability of data and materials</b>                                                                                                                                                                                                                                                                                                                                                                                                                                                                                           | Yes                    |

All datasets and code on which the conclusions of the paper rely must be either included in your submission or deposited in [publicly available repositories](#) (where available and ethically appropriate), referencing such data using a unique identifier in the references and in the “Availability of Data and Materials” section of your manuscript.

Have you have met the above requirement as detailed in our [Minimum Standards Reporting Checklist](#)?

1 **A new mass spectral library for high-coverage and reproducible analysis of the *Plasmodium***  
2 ***falciparum*-infected red blood cell proteome**

3 Authors: [Ghizal Siddiqui](#)<sup>1\*</sup>, Amanda De Paoli<sup>1</sup>, Christopher A. MacRaild<sup>1</sup>, Anna E. Sexton<sup>1</sup>, Coralie  
4 Boulet<sup>2</sup>, Anup D. Shah<sup>3,4</sup>, Mitchell B. Batty<sup>1</sup>, Ralf B. Schittenhelm<sup>3</sup>, Teresa G. Carvalho<sup>2</sup>, and Darren  
5 J. Creek<sup>1\*</sup>

6 <sup>1</sup>Monash Institute of Pharmaceutical Sciences, Monash University, Melbourne, Australia; <sup>2</sup>Department  
7 of Physiology, Anatomy and Microbiology, La Trobe University, Bundoora, Victoria 3086, Australia,  
8 <sup>3</sup>Monash Proteomics & Metabolomics Facility, Department of Biochemistry and Molecular Biology,  
9 Biomedicine Discovery Institute, Monash University, Clayton, Victoria 3800, Australia, <sup>4</sup>Monash  
10 Bioinformatics Platform, Biomedicine Discovery Institute, Monash University, Clayton, Victoria 3800,  
11 Australia.

12 \* Corresponding authors: Darren J. Creek, Drug Delivery, Disposition and Dynamics, Monash Institute  
13 of Pharmaceutical Sciences, Monash University, Parkville Campus, Parkville, Victoria, Australia. Tel:  
14 [+61 \(0\) 3 9903 9249](tel:+61(0)399039249); Fax: [+61 \(0\) 3 9903 9583](tel:+61(0)399039583); e-mail, [Darren.creek@monash.edu](mailto:Darren.creek@monash.edu)

15 Ghizal Siddiqui, Drug Delivery, Disposition and Dynamics, Monash Institute of Pharmaceutical  
16 Sciences, Monash University, Parkville Campus, Parkville, Victoria, Australia. Tel: [+61 \(0\) 3 9903](tel:+61(0)399039282)  
17 [9282](tel:+61(0)399039282); e-mail, [Ghizal.siddiqui@monash.edu](mailto:Ghizal.siddiqui@monash.edu)

18 **Abstract – currently at 245**

19 **Background:** *Plasmodium falciparum* causes the majority of malaria mortality worldwide, and the  
20 disease occurs during the asexual red blood cell (RBC) stage of infection. In the absence of an effective  
21 and available vaccine, and with increasing drug resistance, asexual RBC stage parasites are an important  
22 research focus. In recent years, mass spectrometry-based proteomics using Data Dependent Acquisition  
23 (DDA) has been extensively used to understand the biochemical processes within the parasite. However,  
24 DDA is problematic for the detection of low abundance proteins, proteome coverage, and has poor run-  
25 to-run reproducibility.

26 **Results:** Here, we present a comprehensive *P. falciparum*-infected RBC (iRBC) spectral library to  
27 measure the abundance of 44,449 peptides from 3,113 *P. falciparum* and 1,617 RBC proteins using a  
28 Data Independent Acquisition (DIA) mass spectrometric approach. The spectral library includes  
29 proteins expressed in the three morphologically distinct RBC stages (ring, trophozoite, schizont), the  
30 RBC compartment of trophozoite-iRBCs, and the cytosolic fraction from uninfected RBCs (uRBC).  
31 This spectral library contains 87% of all *P. falciparum* proteins that have previously been reported with  
32 protein-level evidence in blood stages, as well as 692 previously unidentified proteins. The *P.*  
33 *falciparum* spectral library was successfully applied to generate semi-quantitative proteomics datasets

34 that characterise the three distinct asexual parasite stages in RBCs, and compared artemisinin resistant  
35 (Cam3.II<sup>R539T</sup>) and sensitive (Cam3.II<sup>rev</sup>) parasites.

36 **Conclusion:** A reproducible, high-coverage proteomics spectral library and analysis method has been  
37 generated for investigating sets of proteins expressed in the iRBC stage of *P. falciparum* malaria. This  
38 will provide a foundation for an improved understanding of parasite biology, pathogenesis, drug  
39 mechanisms and vaccine candidate discovery for malaria.

40 Data are available via ProteomeXchange with identifier PXD027241 and PXD027301.

41 **Keywords:** *Plasmodium falciparum*, Malaria, Proteomics, Data dependent acquisition, Data  
42 independent acquisition, Red blood cells, LC-MS/MS

## 43 **Background**

44 Malaria, a mosquito-borne disease caused by *Plasmodium* parasites, is endemic in countries of  
45 Southeast Asia, Latin America and the sub-Saharan regions of Africa. *Plasmodium falciparum* is the  
46 most lethal of human *Plasmodium* parasites [1]. *P. falciparum* has a complex lifecycle characterised by  
47 distinctive morphological changes that span the human and mosquito host, with each stage of  
48 development supported by versatile biological processes that allow the parasite to adapt to multiple host  
49 environments. However, pathologies associated with this disease are entirely attributed to the  
50 proliferative asexual development within the human red blood cells (RBCs). During a single replication  
51 cycle within the RBCs, parasites undergo pronounced changes over a period of 48 hours which can be  
52 roughly divided into three stages: rings (0-20 hours post invasion (h.p.i)), trophozoites (22-38 h.p.i) and  
53 schizonts (40-48 h.p.i). The latter stage results in up to 32 daughter merozoites rupturing from a single  
54 infected cell, re-entering circulation and propagating the infection [2-4]. Because of the pathologies  
55 associated with these RBCs stages, it is not surprising that most treatment efforts focus on this stage.

56 The global endeavour towards eradication of malaria would be greatly enhanced by access to an  
57 effective and affordable vaccine. However, with no such vaccine yet available, prevention and treatment  
58 approaches will continue to rely on the use of vector control strategies and chemotherapeutics.  
59 Furthermore, eradication from endemic regions is hampered by the emergence of drug resistance to  
60 frontline artemisinin-based therapies and partner drugs in the Greater Mekong region of Southeast Asia  
61 [5, 6] and, more recently and perhaps most troubling, the emergence of *de novo* artemisinin resistance  
62 in Africa [7]. Collectively, this drug-resistance hampers the global progress towards elimination goals  
63 and highlights the urgent need for a greater understanding of *P. falciparum* biochemistry to underpin  
64 the discovery of new medicines, diagnostics and vaccines.

65 In recent years, large-scale quantitative proteomics has facilitated the accurate identification of proteins  
66 in complex mixtures, examination of alterations in protein expression and abundance, and probing the  
67 composition of protein-protein complexes. While other system-wide methods for molecular analysis of  
68 *P. falciparum*, such as transcriptomics, have been useful for identifying unique sets of potential  
69 molecular targets, mRNA expression often poorly correlates with protein abundance [8-12]. Therefore,  
70 direct measurement of protein abundance provides a better representation of the parasite phenotype  
71 under given study conditions compared to transcript levels.

72 Liquid chromatography tandem mass spectrometry (LC-MS/MS)-based quantitative proteomics is the  
73 method of choice to measure dynamic changes in global protein levels across biological samples. Data  
74 dependent acquisition (DDA) has been extensively used to understand the scope of protein changes  
75 across different conditions, whereby the top 10 or 20 precursor MS1 ions detected in the MS for each  
76 scan are fragmented to give product ion spectra (MS2), which provides a fingerprint for peptide  
77 detection and identification [13, 14]. However, the stochastic nature of precursor selection for

78 fragmentation leads to inconsistencies and variations in peptide identification between replicates and  
79 samples. This becomes particularly problematic for low abundance peptides and reduces the number of  
80 proteins that can be accurately quantified [15, 16]. Data-independent acquisition (DIA) is gaining  
81 popularity as an alternative data collection method, as MS2 spectra are collected for multiple peptides  
82 within a predefined mass-to-charge ( $m/z$ ) range by co-isolating and fragmenting all peptide precursors  
83 within the  $m/z$  range at once [17]. Although the  $m/z$  range definition may still exclude some peptide  
84 populations, DIA ultimately results in extremely high run-to-run reproducibility and a more  
85 comprehensive data set over a shorter time period, making it superior to DDA [17-21].

86 The primary approach for DIA analysis requires prior knowledge of peptide fragmentation stored in  
87 spectral ion libraries. Furthermore, as library quality directly influences DIA results, it is important to  
88 have a comprehensive and in-depth library that accurately represents the proteome of the organism  
89 under investigation [17, 18]. Comprehensive spectral libraries are available for many model organisms  
90 [19-21]. However, no such library exists for *P. falciparum*, although such a tool would provide  
91 multifaceted support for the identification of much needed drug targets and vaccine candidates. In this  
92 study, we produced a comprehensive library obtained from *P. falciparum*-infected RBCs (iRBCs),  
93 identifying 3,113 parasite and 1,617 RBC proteins. The spectral library combined with the DIA-MS  
94 method was used to perform quantitative analyses of the three distinct asexual RBC stages of the 3D7  
95 wild-type reference line, and the trophozoite stage of artemisinin resistant (Cam3.II<sup>R539T</sup> and  
96 Cam3.II<sup>C580Y</sup>) and sensitive (Cam3.II<sup>ev</sup>) lines. The comprehensive library generated in this study  
97 combined with the DIA methodology provides an exquisite and valuable resource to address basic  
98 biological questions. Drug mode-of-action studies, the identification of novel therapeutic targets, as  
99 well as studies aimed at identifying vaccine antigens and diagnostic markers of *P. falciparum* infection  
100 will also benefit from this resource.

## 101 **Data description**

102 Given nearly half of the world's population is at risk of contracting malaria, an in-depth understanding  
103 of the proteins involved in disease onset and progression, and how their expression, structure, and  
104 function are responsible for disease pathology in the iRBC stage, is critical. Technical advances in  
105 proteomics for malaria, such as DIA, are required to fully identify and quantify the entire complement  
106 of proteins. DIA analysis requires access to large and comprehensive proteomic datasets. To address  
107 these gaps, we generated a comprehensive spectral library from highly synchronised asexual ring-,  
108 trophozoite- and schizont-stage parasites of the *P. falciparum* 3D7 reference strain, including the  
109 cytosolic fractions from uRBCs and the infected-RBC cytosol (where the parasite exports a large  
110 number of its proteins [22]) of trophozoite-iRBCs. Parasites were released from the host RBC using  
111 0.1% saponin, centrifuged and collected as pellets for downstream protein extraction (saponin pellet).  
112 The saponin supernatant, containing the soluble cytosolic contents from the host RBC, were incubated  
113 with TALON® Metal Affinity Resin to remove haemoglobin prior to protein extraction. Proteins from  
114 both the cytosolic and parasite fractions were solubilised and subjected to proteolysis with trypsin. The  
115 digested samples were then extensively fractionated using SCX Bond Elut Plexa cartridges and  
116 analysed using nanoLC-MS/MS. The raw data were analysed using MaxQuant to generate the spectral  
117 library, identifying 3,113 parasite and 1,617 RBC proteins, which was then incorporated into  
118 Spectronaut for further application. The spectral library covered 87% of all proteins previously detected  
119 in the *P. falciparum* blood stages by mass spectrometry and added a further 692 proteins that were not  
120 previously reported with detection at the protein-level in asexual *P. falciparum* parasites.

121 The spectral library was successfully applied for quantitative analysis of *P. falciparum* proteins. We  
122 demonstrated a capacity to quantify 2,063 *P. falciparum* proteins with nearly no missing proteins across  
123 ring, trophozoite, and schizont stages of infection using the DIA method. Subsequent enrichment  
124 analysis highlighted a plethora of stage-specific functional diversity across blood-stage development.  
125 We also utilised the spectral library to compare 2,317 *P. falciparum* proteins between artemisinin  
126 resistant (Cam3.II<sup>R539T</sup> and Cam3.II<sup>C580Y</sup>) and sensitive (Cam3.II<sup>rev</sup>) parasites [23]. We confirmed our  
127 previous DDA-based quantitative proteomics analysis of these lines [24] and further identified a number  
128 of additional parasite proteins enriched in specific dysregulated pathways. Table 1 shows the parasite  
129 stage, including hours post RBC invasion, and the number of parasites used for quantitative analysis.  
130 This analysis confirmed that the spectral library generated in this work, accompanied by the DIA  
131 methodology, can successfully perform reproducible, specific and accurate quantitative proteomics of  
132 *P. falciparum* asexual RBC stages and can be used to investigate a wide range of biological questions.  
133 Furthermore, the comparative DIA studies will be available as datasets in PlasmoDB [25], to act as  
134 reference databases for the worldwide community of malaria researchers.



135 **Table 1. Parasites used for quantitative proteomics applying the *P. falciparum* spectral library**  
 136 **and DIA-MS methodology.** h.p.i: hours post invasion, HCT: haematocrit.

| Parasite line                                       | Stage                     | Number of parasites used                | Normalised on protein amount | µg protein/parasite      |
|-----------------------------------------------------|---------------------------|-----------------------------------------|------------------------------|--------------------------|
| 3D7 reference strain                                | Ring (6-12 h.p.i)         | 16% parasitaemia, 2% HCT, 45 ml culture | 500 µg of protein            | 69 µg/ 1ml of parasites  |
| 3D7 reference strain                                | Trophozoite (22-28 h.p.i) | 8% parasitaemia, 2% HCT, 15 ml culture  | 500 µg of protein            | 417 µg/1 ml of parasites |
| 3D7 reference strain                                | Schizont (38-42 h.p.i)    | 8% parasitaemia, 2% HCT, 15 ml culture  | 500 µg of protein            | 417 µg/1 ml of parasites |
| Cam3.II <sup>R539T</sup> Artemisinin resistant [23] | Trophozoite (22-26 h.p.i) | 8% parasitaemia, 2% HCT, 15 ml culture  | 500 µg of protein            | 417 µg/1 ml of parasites |
| Cam3.II <sup>rev</sup> Artemisinin sensitive [23]   | Trophozoite (22-26 h.p.i) | 8% parasitaemia, 2% HCT, 15 ml culture  | 500 µg of protein            | 417 µg/1 ml of parasites |
| Cam3.II <sup>C580Y</sup> Artemisinin resistant [23] | Trophozoite (22-26 h.p.i) | 8% parasitaemia, 2% HCT, 15 ml culture  | 500 µg of protein            | 417 µg/1 ml of parasites |

137

## 138 **Analyses**

### 139 ***Generation of DDA library***

140 Here we present a comprehensive *P. falciparum* asexual RBC stage spectral library to support protein  
141 quantification by DIA-MS. The library was generated by combining 56 DDA analyses of peptide  
142 samples derived from asexual ring-, trophozoite- and schizont-stage parasites (parasite pellets) and the  
143 cytosolic fractions from uRBCs and the RBC compartment of trophozoite-iRBCs. For the cytosolic  
144 fractions, haemoglobin was removed using TALON® Resin prior to protein precipitation using TCA  
145 and further solubilisation as per Figure 1. The DDA data was collected through extensive peptide  
146 fractionation using SCX cartridges and analysed using untargeted nanoLC-MS/MS with reversed phase  
147 chromatography and high resolution (Orbitrap) mass spectrometry. The library was generated using  
148 MaxQuant (Fig 1). The *P. falciparum* asexual RBC stage spectral library identified 44,449 proteotypic  
149 peptides which mapped to 3,113 *P. falciparum* proteins and 1,617 human RBC proteins (Sup data 1).

### 150 ***Properties of the P. falciparum asexual RBC stage spectral library***

151 To demonstrate the proteome coverage of the *P. falciparum* asexual stage spectral library, we compared  
152 the proteins included in this library with those in the online reference database, PlasmoDB (release 51)  
153 [25] (5,712 protein-encoding genes based on the current genome annotation), and those with evidence  
154 of prior detection at the protein level (2,792 protein groups) based on mass spectrometric approaches in  
155 the asexual RBC stage [25]. We report that 2,419 of the 3,113 proteins identified in this library have  
156 been detected previously, representing 87% of genes previously annotated with evidence of protein-  
157 level expression in *P. falciparum*. Importantly, the remaining 692 proteins identified in this library have  
158 not been reported previously with mass spectrometry evidence of protein-level expression in asexual  
159 stage development (Sup data 2) (Fig 2A). Among these 692 additional proteins, 210 (30%) were  
160 identified with one unique peptide, while the rest were identified with two or more unique peptides. The  
161 single-hit peptides had high quality MS2 spectra and the same peptide was seen 15 times, on average,  
162 in the DDA dataset (minimum 4 times). Furthermore, to show the coverage of each protein detected in  
163 the entire library, we calculated the number of proteotypic peptides observed per protein. About 30%  
164 of the proteins in the library contained >10 proteotypic peptides, and 85% of these contained at least  
165 two proteotypic peptides per protein (Sup data 3) (Fig 2B). Further analysis of proteins identified in this  
166 spectral library revealed 579 *P. falciparum* proteins identified from the saponin supernatant of iRBCs,  
167 of which only 22 proteins were specific to the RBC cytosol of the iRBCs and not detected in parasite  
168 cell pellets (Fig 2C). Out of the 3,091 *P. falciparum* proteins identified from the parasite pellet, 630  
169 came from the ring-stage fraction, 2,674 from the trophozoite-stage fraction, and 2,706 from the  
170 schizont-stage fraction, with 607 proteins common between all three stages (Fig 2D). For the uRBC  
171 proteome, we identified a total of 1,617 proteins, of which 408 were soluble in the saponin lysate, 478

172 overlapped between soluble and insoluble fractions, and 731 were unique to the insoluble fraction (Sup  
173 data 1) (Sup Fig 1).

174 It is important to assess the characteristics of this library in comparison to what has been previously  
175 published for *P. falciparum* in order to ensure it is well-suited to relevant studies of parasite biology.  
176 Therefore, we analysed proteins identified in this spectral library with respect to published mRNA  
177 expression (Fig 2E). We analysed four classes of parasite proteins: those in this library and with prior  
178 mass spectrometry level evidence in asexual blood stages documented in PlasmoDB (common);  
179 proteins absent from this library but with protein-level evidence in PlasmoDB (PlasmoDB unique);  
180 proteins in this library that had not previously been identified in asexual RBC stages (library unique);  
181 and predicted parasite proteins that are not identified in either this library or in any published asexual  
182 RBCs proteomics dataset (not seen) (Fig 2E) [26]. Proteins commonly seen had the highest transcript  
183 abundance based on normalised RNAseq counts (FPKM), while proteins unique to either PlasmoDB or  
184 this library had lower transcript abundance (Fig 2E). Furthermore, proteins that lacked proteomic-level  
185 evidence in asexual stages had the lowest transcript abundance, suggesting that this basal level of  
186 transcription does not necessitate translation of detectable amounts of this protein subset in asexual  
187 stages, and that expression levels may be higher in other stages of the *P. falciparum* lifecycle. To  
188 address this hypothesis, we compared the protein expression of identified (seen) and unidentified (not  
189 seen) proteins to previously published mRNA expression data from sexual stages in blood (gametocytes)  
190 and mosquito (oocyst and sporozoite). Our results indicate that proteins “not seen” had higher transcript  
191 abundance in gametocytes, oocyst and sporozoites compared to asexual stages (Fig 2F) [27, 28],  
192 supporting the hypothesis that undetected proteins with low-level mRNA transcription in asexual stages  
193 likely have a specific function in sexual stage parasite development. Our study provides clear evidence  
194 that ~50% of *P. falciparum* genes are expressed during asexual RBC stages, while the other 50% have  
195 a primary function in other life cycle stages.

#### 196 ***Accuracy of the asexual spectral library using DIA-MS methodology***

197 To show the application of the *P. falciparum* spectral library using DIA-MS, we prepared ring-,  
198 trophozoite- and schizont-stage parasites with a minimum of three biological replicates in experiment  
199 1 and two-three biological replicates in experiment 2 (Fig 3 and Sup Fig 2). Raw DIA files loaded into  
200 Spectronaut™ and processed with its associated default workflow for peptide identification against our  
201 spectral library, followed by protein normalisation and quantification. In total, about 19,000 peptides  
202 and more than 2,000 proteins (2,064 proteins for experiment 1; 2,120 proteins for experiment 2) were  
203 quantified in each of the distinct stages of the parasite using the *P. falciparum* library (Sup data 4; Fig  
204 3 and Sup Fig 2).

205 To evaluate the quality of the *P. falciparum* library-based analysis, we compared protein abundances  
206 of 1,990 common proteins (proteins without missing values) across the two different experiments (Sup

207 data 5 and Fig 4). Pearson's correlation coefficients between experiment 1 and experiment 2 were 0.7  
208 for rings, 0.5 for trophozoites and 0.6 for schizonts (Fig 4A). Heatmap analysis of protein expression  
209 across the three stages for the two experiments indicated that the expression patterns of the proteins are  
210 reproducible (Fig 4B). To further determine quantitative reproducibility, we computed the coefficient  
211 of variation (CV) in each specific asexual stage across both experiments. For all asexual specific stages,  
212 the median CVs of protein abundances were below 10% (Fig 4C) with the exception of the ring-stage  
213 sample in experiment 2 (CV=17.8%). Collectively, the *P. falciparum* asexual library-based analysis  
214 using our DIA-MS exhibited excellent reproducibility.

215 Hierarchical clustering confirms the good agreement between biological replicates and shows a clear  
216 distinction of expression pattern between the three asexual stages (Fig 3, Sup Fig 2, and Sup Fig 3).  
217 Heatmap analysis shows that trophozoite and schizont stages are very similar to one another, but quite  
218 distinct from the early ring-stage parasites (Fig 3, Sup Fig 2, and Sup Fig 3). Analysis of proteins  
219 differentially expressed between these distinct stages (that had a raw p-value of < 0.05), including  
220 proteins enriched from ring- to trophozoite-stage, trophozoite- to schizont-stage and finally schizont-  
221 to ring-stage, revealed sets of proteins specific to each of these stage transitions (Fig 5). This analysis  
222 of the expression pattern of proteins across the stages was further confirmed and compared to  
223 experiment two and another experiment (experiment three), which only contained the comparison of  
224 ring- to schizont- stage parasites (Sup Fig 2; trophozoite-stage parasite data was not acquired).  
225 Enrichment analysis showed a distinct clustering of GO biological processes across each of the three  
226 developmental stages (Sup data 6) (Fig 5). Comparison of the ring- to trophozoite-stage transition  
227 displayed a range of significantly over-represented pathways ( $p \leq 0.05$ ), with the most significant  
228 clustered processes enriched in regulation of host-cell entry and protein transport-related terms in rings,  
229 which collectively describes establishment of active infection within a new host RBC. In contrast, both  
230 trophozoite to schizont- and schizont- to ring-transitions display a more specific clustering of enriched  
231 pathways; ribosomal biogenesis (up-regulated in trophozoites) is the most representative cluster in  
232 trophozoite- to schizont-stage, whereas processes relating to cell division (up-regulated in schizonts)  
233 are highly represented in schizont- to ring-stage parasites, consistent with the replicative end point of  
234 asexual development (Fig 5).

235 The common reference strain of *P. falciparum*, 3D7 wildtype strain, was used for the generation of this  
236 spectral library. In order to test if this DIA-MS library can be used for other *P. falciparum* strains, we  
237 performed quantitative DIA-MS on 500  $\mu$ g of protein lysate from the artemisinin resistant Kelch-13-  
238 mutant Cambodian isolate, Cam3.II<sup>R539T</sup>, and the related artemisinin sensitive Cam3.II<sup>rev</sup> line. We  
239 identified a total of 2,317 *P. falciparum* proteins in all samples (Sup data 7). Heatmap and volcano plot  
240 analysis of all identified proteins demonstrated a greater number of proteins that were dysregulated  
241 between the two lines compared to previous proteomics analyses using a DDA-based approach (Fig 6A  
242 and B) [24]. The abundance of one of the dysregulated proteins, Kelch13 (Pf3D7\_1343700) was found

243 to be two-fold lower in artemisinin-resistant Cam3.II<sup>R539T</sup> parasites compared to artemisinin-sensitive  
244 Cam3.II<sup>rev</sup> (Fig 6C) consistent with previous studies [24, 29, 30]. One sample from the related  
245 artemisinin resistant line bearing a different mutation in Kelch13, Cam3.II<sup>C580Y</sup>, was also analysed to  
246 confirm proteins that were differentially dysregulated in artemisinin-resistant parasites compared to  
247 Kelch13 wildtype (Cam3.II<sup>rev</sup>) parasites. Detailed analysis of GO term enrichment from dysregulated  
248 proteins identified entry into host cell and vesicular trafficking (<0.006 p-value) to be overrepresented  
249 in proteins significantly dysregulated (>0.05 p-value) (Fig 7), suggesting a role for these processes in  
250 the mechanism of artemisinin resistance (Sup data 6).

251

## 252 Discussion

253 *P. falciparum* continues to cause the most severe form of malaria in humans. Despite years of study  
254 into the basic biochemical and molecular biology of these complex parasites, many questions remain  
255 unanswered. Data-dependent mass-spectrometry based proteomics (DDA-MS) has been used  
256 extensively to reveal important features of the parasite's regulatory mechanisms. However, there are  
257 many issues with DDA-MS, including run-to-run reproducibility and identification of less abundant  
258 proteins. Therefore, a relatively high amount of starting material and extensive sample fractionation is  
259 required to generate high quality proteomics data with reasonable depth of coverage. This is evident  
260 from our DDA-MS of each of the distinct stages, and also from previous publications, where 1-2 mg of  
261 starting material was used followed by extensive fractionation [24, 31]. In comparison, many of the  
262 DDA-MS problems can be circumvented using a data-independent acquisition (DIA-MS) methodology,  
263 which requires 2-4 times less biomass of starting material (500 µg) and avoids the need for fractionation  
264 (Fig 1B).

265 Another benefit of generating a spectral library rather than using traditional DDA-MS is reproducibility  
266 and run-to-run consistency in regards to the identification of peptides and proteins. This is shown in our  
267 DDA-MS analysis of ring-, trophozoite- and schizont-stage parasites for spectral library generation,  
268 where only 607 proteins were found to be common to all three stages (Fig 2D). This is further supported  
269 by many published proteomics analyses of these three distinct stages, where 600-700 proteins were  
270 commonly identified [29, 32-34], and proteomics analysis of one distinct stage with different treatment  
271 conditions where 600-1,000 proteins were identified [35, 36]. In contrast, with DIA-MS, the overlap of  
272 proteins detected across the three stages are frequently around the order of 2,000 *P. falciparum* proteins  
273 - three times more than in DDA-MS analysis (Fig 4C, Supp Fig 2A and C). Previous DDA-MS of  
274 artemisinin resistant and sensitive parasites had identified 2,824 proteins. However, due to the nature  
275 of DDA-MS, only 520 proteins were included in the final analysis as the dataset contained many missing  
276 values [24]. Using DIA-MS methods in this study to analyse these same resistant and sensitive parasites  
277 led to the reproducible identification of 2,317 *P. falciparum* proteins across all samples, again  
278 demonstrating the benefits of DIA-MS using this spectral library compared to a typical DDA-MS. We  
279 were also able to demonstrate that DIA-MS experiments analysed by mass spectrometry on different  
280 days were generally reproducible (Fig 4A and B), and the median CVs of protein abundances within  
281 each experiment was less than 10%, with the exception of ring-stage proteomics from experiment 2  
282 (Fig 4C). Saponin lysis of mature iRBCs (trophozoite and schizonts) is more reproducible compared to  
283 ring-stage parasites, with a number of metabolomics and proteomic studies of this early stage  
284 demonstrating the heavy influence of host metabolites and proteins, subsequently contributing to the  
285 variability between samples [24, 37]. Despite this, we were still able to demonstrate that DIA-MS using  
286 the spectral library very clearly outperforms DDA-MS when it comes to reproducibility and run-to-run  
287 identification.

288 In quantitative proteomic studies, high quantification reproducibility is of utmost importance. Therefore,  
289 for the majority of DDA-based proteomics studies of *P. falciparum* asexual stages, labelling of peptides  
290 is usually necessary [24, 29, 35]. Labelling approaches generally limit the number of samples that can  
291 be included in a single study, and are expensive and time consuming, while DIA-MS allows for label-  
292 free protein quantification across the entire proteome with quantification performance comparable to  
293 labelling methods [38]. This was evident from the DIA-MS of the resistant and sensitive parasites,  
294 where we identified Kelch13 to be decreased in abundance in artemisinin resistant parasites, with  
295 comparable fold changes to those previously shown using peptide labelling [24] (Fig 6C). Furthermore,  
296 our previous quantitative analysis of artemisinin resistant and sensitive parasites only identified  
297 Kelch13 to be dysregulated [24]. However, the DIA-MS demonstrated a larger number of proteins to  
298 be dysregulated between the two lines (Fig 6). Enrichment analysis of significantly dysregulated  
299 proteins revealed two important processes - entry into host and vesicular mediated transport (Fig 7).  
300 Protein transport (down-regulated in artemisinin resistant parasites) is of particular interest since  
301 Kelch13 has been shown to interact with a number of proteins involved in vesicular trafficking, more  
302 specifically Kelch13 is shown to be involved in endocytosis of host haemoglobin [30, 39]. Mutations  
303 in Kelch13 alters haemoglobin uptake within the parasite, and the mechanism by which the parasite  
304 internalises and transforms haemoglobin into haemozoin is central to artemisinin activation and efficacy  
305 [30, 39]. Therefore, a lack of haemoglobin uptake would result in increased artemisinin tolerance.  
306 Enrichment of the process, entry into host cell (down-regulated in artemisinin resistant parasites) is  
307 surprising and could be a secondary stress response of the resistant parasites by dysregulating the  
308 expression of invasion proteins. Previous studies have demonstrated drug treated trophozoite-stage  
309 parasites to have dysregulated proteins involved in invasion [31, 35]. Another possibility for the  
310 enrichment of invasion proteins could be related to the role of Kelch13 in vesicular trafficking. Invasion  
311 proteins are sorted into secretory organelles, which are endosomal like structures, and it is possible that  
312 mutation of Kelch13 affects either biogenesis of secretory organelles or sorting of invasion proteins into  
313 these organelles [40, 41].

314 Access to a detailed spectral library is critical for understanding the mechanisms by which *P. falciparum*  
315 parasites regulate their development, and identifying proteins important for each specific stage is a key  
316 element towards a rational design of agents for prophylaxis and treatment of malaria. Our study  
317 demonstrated that by combining this spectral library with the DIA-MS approach, we were able to add  
318 critical information about proteins expressed in the three distinct asexual blood stages of the  
319 *P. falciparum* parasite. Previously, quantitative analysis of these three distinct stages using DDA  
320 analysis demonstrated that there is a large proportion of proteins (54% of identified proteins) exhibiting  
321 variable expression across these stages [32]. However, this DIA-based analysis demonstrated that  
322 trophozoite- to schizont-stage parasite proteins are similar in expression, while ring- to trophozoite- or  
323 schizont-stage are very different (Fig 3, Sup Fig 2 and Sup Fig 3). Analysis of the differences between

324 ring and trophozoite stages enriched for parasite proteins predominantly involved in host cell invasion  
325 and protein sorting (vesicular trafficking) (Fig 5). This is expected as these proteins are necessary for  
326 parasite invasion and establishment of a niche within the host RBC that will allow for the uptake and  
327 utilization of nutrients from the extracellular environment [42, 43]. Trophozoite-stage parasites are  
328 known to be the most metabolically active stage of development [44-46] and the enrichment of  
329 ribosomal biogenesis aligns with an active synthesis of proteins to kick-start metabolism. As the parasite  
330 ages to a schizont, the enrichment of cell division proteins is in preparation for mitotic production of  
331 daughter cells [47] (Fig 5). These daughter cells, upon rupture of the infected cell, re-invade naïve RBCs  
332 to propagate infection.

333 It is well known that there is little correlation between mRNA and protein abundances in a number of  
334 systems, as a result of post-transcriptional and post-translational regulatory mechanisms. These  
335 mechanisms have also been shown to be important in regulation of gene expression in the asexual stages  
336 of *P. falciparum* parasites [48, 49]. We were interested in testing this observation using the quantitative  
337 analysis of the three distinct stages by comparing proteins in this library to published mRNA expression  
338 of the same stages (Sup data 8) [26]. As per previous publications, our analysis showed that there is  
339 little to no correlation between protein and mRNA abundance (0.2 for rings, 0.5 for trophozoites and  
340 0.3 for schizonts) (Fig 8A and B). Furthermore, translational repression is a common regulatory  
341 mechanism used by these parasites for an effective transition to other stages, which has been clearly  
342 demonstrated for gametocytes and sporozoites, where after fully maturing and upon successful  
343 transmission, they rapidly translate available mRNA [50]. Importantly, it is yet to be shown that  
344 translational repression is used in *P. falciparum* asexual stages and more work is warranted to resolve  
345 the role of these control mechanisms in this stage of the parasite's life cycle.

346 Spectral library searching, as opposed to sequence searching via *in silico* predicted fragmentation  
347 spectra, has greater sensitivity for peptide ions included in the library; however, relatively few DDA  
348 datasets are analysed in this way. A major concern is the incompleteness of the spectral library and in  
349 order to address this issue, we analysed the completeness of the generated library by comparing it to  
350 the database of the *P. falciparum* genome from PlasmoDB. We found that this comprehensive library  
351 has 87% coverage of all previously reported *P. falciparum* proteins with protein-level evidence detected  
352 by mass spectrometry, the other 13% missing from this library were only identified following specific  
353 peptide enrichment procedures, such as phosphoproteomics [25]. This library also added a further 692  
354 proteins to the genes detectable at the protein-level in asexual *P. falciparum* parasites (Fig 2A). Analysis  
355 of mRNA expression for proteins not seen in our library suggested that they may be expressed in other  
356 stages of the *P. falciparum* life cycle, such as gametocytes (sexual stage of the parasite), oocyst and  
357 sporozoites (mosquito stages of the parasite) [27, 28] (Fig 2F). This demonstrates that this spectral  
358 library will be advantageous for the malaria community only for the analysis of the asexual stages, and



359 further DDA proteomics data from other stages is required for the expansion of the library to cover  
360 additional stages of the lifecycle.

361 In addition to the spectral library of the parasite, a library of the host RBC cytosol was also established.  
362 *P. falciparum* heavily modifies its host cell, and although much is known about modification of the host  
363 cell membrane, export of parasite proteins in the RBC cytosol and modification of RBC cytosolic  
364 proteins (such as phosphorylation [51]) remains to be further explored. This spectral library sets the  
365 tone for further investigations in host-parasite interactions, and opens the door to host-directed therapy  
366 approaches.

367 In conclusion, we have generated a comprehensive asexual stage spectral library and demonstrated that  
368 it can be successfully applied for consistent quantification of >2,000 *P. falciparum* proteins using a  
369 DIA-MS analysis pipeline. We showed that quantitative analysis is effective across different  
370 *P. falciparum* strains, but is specific to the asexual blood stages of the parasite. Our freely accessible  
371 library will furnish the research malaria community with a resource to explore future proteome-  
372 phenotypic studies with the advantage of robustness, reproducibility and streamlined procedures.

373

374 **Potential implications**

375 Proteome spectral libraries are available for a number of model organisms, such as yeast and humans.  
376 Here, we provide the first mass spectrometry-based proteome spectral library for *P. falciparum*, the  
377 most lethal of the malaria parasite that infects humans. In this study, we demonstrated how this library  
378 can facilitate DIA-MS proteomics analysis to understand basic biological processes of the parasite in  
379 distinct stages and can contribute to understanding drug resistance mechanisms in these parasites.  
380 Furthermore, the datasets generated in this study for the three distinct asexual blood stages will act as  
381 reference points for malaria researchers wishing to understand the expression profile of their protein of  
382 interest across the stages. From our successful application, we can be certain that spectral library-based  
383 quantitative DIA-MS will usher in a new wave of proteomics studies in the malaria research community  
384 across a wide range of applications, including in molecular classification, biomarker discovery, analysis  
385 of pathogenesis pathways, drug and vaccine discovery, and unravelling mechanisms of therapy response  
386 and resistance. The robustness and efficiency of DIA-MS will also overtake other semi-quantitative  
387 methods as the go-to method for measurement of protein abundances, allowing routine measurement of  
388 ~2,000 proteins rather than single-protein measurements provided by antibody-based approaches.

389

## 390 **Methods**

### 391 ***P. falciparum* spectral library generation using parasite pellets**

392 Asexual *P. falciparum* (3D7 reference strain, Cam3.II<sup>R539T</sup>, Cam3.II<sup>C580Y</sup>, and Cam3.II<sup>rev</sup>) were cultured  
393 as per standard methods [52], with minor adjustments [53]. Briefly, cultures were maintained using O<sup>+</sup>  
394 human RBCs (Australian Red Cross Blood Service) at 2% or 4% haematocrit (HCT) in modified RPMI  
395 1640 medium containing hypoxanthine and 0.5% (w/v) Albumax II (Gibco) at 37°C under defined  
396 atmospheric conditions (95% N<sub>2</sub>, 4% CO<sub>2</sub>, 1% O<sub>2</sub>).

397 To achieve tightly synchronous cultures for library generation, *P. falciparum* cultures with a high  
398 proportion of ring-stage parasites (30 mL, 10-12% parasitaemia, 2% HCT) were synchronised by  
399 performing sorbitol lysis twice, 10 h apart. For schizont library generation, parasites were harvested 27  
400 h after the second sorbitol lysis. At this time point, the cultures contained a high proportion of segmented  
401 schizonts and a small proportion of young ring-stage parasites (<10%). For ring library generation,  
402 parasites were harvested in the second cycle 16-18 h post-infection (h.p.i), while trophozoites were  
403 harvested 28-30 h.p.i. Proteomic samples were prepared as previously described with minor  
404 modifications [24, 54]. For generating stage-specific samples, iRBCs were pelleted by centrifugation  
405 (650 × g, 5 min) and parasites were isolated from RBCs by resuspending in saponin lysis buffer (0.1%  
406 w/v in phosphate buffered saline (PBS)) containing protease and phosphatase inhibitors (PPI); 1 ×  
407 complete mini protease inhibitor cocktail (Roche), 20 mM sodium fluoride and 0.1 mM sodium  
408 orthovanadate) and incubated for 10 mins on ice. Isolated parasites were pelleted (4,000 × g, 7 min) and  
409 washed (15,850 × g, 3 min, supernatant discarded after each wash) a total of three times in 1 mL 1 ×  
410 PBS with PPI.

### 411 ***P. falciparum* library generation using cytosolic uRBC and iRBC fractions**

412 Synchronous cultures were obtained with a double sorbitol lysis (6 h interval). At ~30 h.p.i, iRBCs were  
413 collected by magnet purification [55], quantified using a Neubauer hemocytometer, and 10<sup>9</sup> iRBCs were  
414 aliquoted in microtubes. As a control, 10<sup>9</sup> uRBCs from the same donor were also aliquoted into  
415 microfuge tubes. This was performed 10 times (using RBCs from different donors) and the protein  
416 samples were pooled together to achieve 10<sup>10</sup> uRBCs and 10<sup>10</sup> iRBCs.

417 uRBCs and iRBCs were lysed for 10 min on ice in 600 µl saponin lysis buffer (as described above).  
418 After centrifugation (16,200 × g, 5 min, 4°C), the supernatant, containing cytosolic fraction of the RBCs,  
419 was carefully collected and loaded onto 600 µl of TALON® Metal Affinity Resin slurry (Takara) and  
420 washed with an equal volume of 1× PBS with PPI (600 × g, 2min) to remove haemoglobin. Samples  
421 were incubated with the resin for 10 min on a rotating wheel at 4°C, and the haemoglobin-free  
422 supernatant was collected (2 min at 600 × g; 2 min at 2,400 × g, transferring the supernatant to fresh  
423 pre-chilled microfuge tubes after each wash). Ice-cold trichloroacetic acid (TCA) was added to samples

424 (1:20 of final volume) and incubated for 10 min on ice to facilitate protein precipitation. The pellet was  
425 washed in 1 ml acetone ( $16,200 \times g$ , 3 min), the acetone removed and evaporated, before samples were  
426 stored at  $-80^{\circ}\text{C}$  until required.

#### 427 **Sample collection for quantitative DIA-MS using *P. falciparum* spectral library**

428 To achieve tightly synchronous cultures for quantitative DIA-MS analysis, late schizont-stage parasites  
429 were enriched by magnet purification [55]. The highly enriched parasite fraction was then added to  
430 fresh uRBCs (2% HCT) and left to invade for 3 h before sorbitol synchronisation. For 3D7 parasites,  
431 the parasitaemia was adjusted to 16% and 45 mL was used to prepare rings samples (6 h.p.i). For  
432 trophozoite and schizont stages, 15 mL of the same sample were adjusted to 8% parasitaemia and  
433 samples prepared at 22-28 h.p.i and 38-42 h.p.i, respectively. For artemisinin resistant (Cam3.II<sup>R539T</sup>,  
434 Cam3.II<sup>C580Y</sup>) and sensitive (Cam3.II<sup>ev</sup>) parasites, the parasitaemia was adjusted to 8%, and 15 mL of  
435 trophozoite-stage parasites at 22-26 h.p.i were collected.

#### 436 **Sample preparation for *P. falciparum* spectral library**

437 Saponin pellets were solubilized with SDC lysis buffer (100 mM 4-(2-hydroxyethyl)-1-  
438 piperazineethanesulfonic acid (HEPES), 1% sodium deoxycholate (SDC), pH 8.1) supplemented with  
439 PPI and probe sonicated with  $\times 3$  pulses at 30 secs each. Following sonication, samples were boiled at  
440  $95^{\circ}\text{C}$  for 5 mins, allowed to return to room temperature (RT), before reducing and alkylating with tris(2-  
441 carboxyethyl) phosphine (TCEP) (10mM final) and iodoacetamide (40 mM final) at  $95^{\circ}\text{C}$  for 5 mins.  
442 After returning to RT, proteins were precipitated using ice cold TCA and pellets were resuspended in  
443 SDC lysis buffer without PPI and sonicated to aid protein solubilisation. Protein concentration was  
444 measured using the Pierce bicinchoninic acid (BCA) protein assay and samples adjusted to 3-5 mg of  
445 protein per sample. Trypsin (1:50; Promega) was added and samples were incubated 16 h at  $37^{\circ}\text{C}$  with  
446 constant agitation at 1500 rpm in a Multi-Therm™ (Benchmark Scientific). On the following day,  
447 trypsin activity was quenched using 5% (v/v) formic acid (FA), before adding 100% (v/v) ethyl acetate  
448 to remove detergent. The samples were centrifuged at  $4000 \times g$  for 5 mins and the top layer of  
449 supernatant was removed. Samples were dried using CentriVap Benchtop Centrifugal Vacuum  
450 Concentrator (Labconco) at 100 mbar and  $37^{\circ}\text{C}$  for 10 mins to remove excess ethyl acetate. The  
451 samples were then diluted five-fold and loaded onto a SCX Bond Elut Plexa (Agilent) and eluted into  
452 12 fractions as described previously [24]. Peptides were then eluted from SCX cartridges using 500  $\mu\text{l}$   
453 of elution buffers at a rate of one drop/sec. Elution buffers consisted of increasing concentrations of  
454 ammonium acetate (Sigma-Aldrich) (75 mM, 100 mM, 125 mM, 150 mM, 175 mM, 225 mM, 250 mM,  
455 275 mM, 300 mM, 325 mM, and 350 mM) with 20% (v/v) acetonitrile (ACN) and 0.5% (v/v) FA. The  
456 final elution buffer consisted of 80% ACN and 5% ammonium hydroxide (Sigma-Aldrich) to remove  
457 any remaining bound peptides. Eluates (fractions) were semi-dried to remove most of the ACN and then  
458 subjected to desalting using in-house generated StageTips as described previously [56]. The desalted

459 fractions were dried to completion and reconstituted in 20  $\mu$ l of 2% ACN and 0.1% FA, sonicated for  
460 15 mins and subject to automatic vortexing for a further 15 mins to allow complete resuspension of  
461 peptides. To facilitate retention-time alignments among samples, a retention-time kit (iRT kit,  
462 Biognosys, GmbH) was spiked at a concentration of 1:20 (v/v) for all fractions [57]. Samples were  
463 stored at -80°C and the particle free supernatant was transferred to LC-MS vials immediately prior to  
464 LC-MS/MS analysis.

#### 465 **Sample preparation for quantitative DIA-MS**

466 Sample preparation for DIA-MS was mostly the same as sample preparation for spectral library  
467 generation with minor modifications. Significantly less protein material was digested overnight with  
468 trypsin, 500  $\mu$ g compared to 3-5 mg. On the following day, the peptide samples were not subjected to  
469 SCX fractionation, but rather directly desalted using in-house generated StageTips as described  
470 previously [56]. The desalted peptide samples were then dried to completion and reconstituted in 20  $\mu$ l  
471 of 2% ACN and 0.1% FA with iRT peptides [57]. Samples were stored at -80°C and the particle free  
472 supernatant was transferred to LC-MS vials immediately prior to LC-MS/MS analysis.

#### 473 **Mass spectrometric instrumentation and data acquisition**

474 For DDA acquisition, NanoLC-MS/MS was carried out as described previously [24], with minor  
475 modifications. Samples were loaded at a flow rate of 15  $\mu$ l/min onto a reversed-phase trap column (100  
476  $\mu$ m  $\times$  2 cm), Acclaim PepMap media (Dionex) and maintained at a temperature of 40°C. Peptides were  
477 eluted from the trap column at a flow rate of 0.25  $\mu$ l/min through a reversed-phase capillary column (75  
478  $\mu$ m  $\times$  50 cm) (LC Packings, Dionex). For acquisition by HPLC, a 158 min gradient was set using an  
479 incremental gradient that reached 30% ACN after 123 min, 34% ACN after 126 min, 79.2% ACN after  
480 131 min and 2% ACN after 138 min for a further 20 min. The mass spectrometer was operated in a  
481 data-dependent mode with 2 microscans FTMS scan event at 70,000 resolution over the  $m/z$  range of  
482 375-1575 Da in positive ion mode. The 20 most intense precursors with charge states 2-6 were selected  
483 for fragmentation with normalised collision energy 27.0, activation time of 15 ms and dynamic  
484 exclusion enabled. For DIA, a 25-fixed-window setup of 24  $m/z$  effective precursor isolation over the  
485  $m/z$  range of 376-967 Da was applied.

#### 486 **Shotgun data searching and spectral library generation**

487 DDA files were searched against *P. falciparum* (UP000001450, release version 2016\_04) and *Homo*  
488 *sapiens* (UP000005640, release version 2017\_05) UniProt FASTA databases and the Biognosys iRT  
489 peptides database. The number of entries in the database actually searched were 3,970,852 with trypsin  
490 as enzyme specificity and 2 missed cleavages were permitted. Carbamidomethylation of cysteines was  
491 set as a fixed modification. Oxidation of methionine and protein N-terminal acetylation were set as  
492 variable modifications. Parent mass error tolerance and fragment mass tolerance were set to 20 ppm.

493 For both peptide and protein identification, a false discovery rate (FDR) of 1% was used. MaxQuant  
494 search results were imported as spectral libraries into Spectronaut using default settings. MaxQuant  
495 output files were obtained and imported into Spectranout and iRT values were computed using the linear  
496 iRT regression function embedded in Spectranout. A consensus library was generated for *P. falciparum*  
497 iRBCs and saved for downstream targeted analysis. The consensus library contained 44,449 peptides  
498 corresponding to 4,730 proteins.

#### 499 **Spectronaut targeted data extraction**

500 Raw files were processed using Spectronaut™ (version 13.0) against the in-house generated  
501 *P. falciparum* spectral library. For processing, raw files were loaded in Spectronaut, the ideal mass  
502 tolerances for data extraction and scoring were calculated on its extensive mass calibration with a  
503 correction factor of 1. Both at precursor and fragment level, the highest data-point within the selected  
504 *m/z* tolerance was chosen. Identification of peptides against the library was based on default Spectronaut  
505 settings (Manual for Spectronaut 13.0, available on Biognosis website). Briefly, precursor Qvalue Cut-  
506 off and Protein Qvalue Cut-off were as per default at 1% and therefore only those that passed this cut-  
507 off were considered as identified and used for subsequent processing. Retention time (RT) prediction  
508 type was set to dynamic indexed RT. Interference correction was performed at the MS2 level. For  
509 quantification, interference correction was activated and cross run normalisation was performed using  
510 the total peak area at a significance threshold of 0.01. Fold-changes for the ring-stage versus  
511 trophozoite-stage and schizont-stage were calculated in Microsoft Excel and p-values were calculated  
512 using a standard Student's t-test. Volcano plots and hierarchical clustering is performed in  
513 Metaboanalyst [58]. Hierarchical clustering analysis was carried on two sets, namely, all identified  
514 *P. falciparum* proteins, and 400 differentially regulated proteins.

#### 515 **Comparative analysis of protein to mRNA expression**

516 The public transcriptomics data for the same developmental stages of *P. falciparum* from Toenhanke  
517 *et.al.* [26] was obtained from GEO (Accession: GSE104075). Counts data was generated by mapping  
518 to the reference genome of *P. falciparum* (P3D7-release-39) using RNAsik pipeline implemented in the  
519 Laxy platform (<https://doi.org/10.5281/zenodo.3767371>). The transcriptomics data was then CPM  
520 normalised in Degust Software. The comparative analysis was carried out in R for common gene/protein  
521 expressions found in both transcriptomics and proteomics data. First, the average expression of each  
522 protein was calculated for each developmental stage, which was then used to calculate Pearson's  
523 correlation coefficient between transcript and protein abundance.

#### 524 **GO Enrichment Analysis**

525 Protein abundance values were log-transformed and subjected to pairwise Student's t-tests to assess  
526 differences in abundance between ring-, trophozoite- and schizont-stages, or between Cam3.II<sup>R539T</sup> and

527 Cam3.II<sup>rev</sup> parasites. The resulting p-values were used as protein scores in a GO enrichment analysis  
528 using topGO, using the classic algorithm and ks statistic to assess GO-term enrichment.

529 Over-represented GO terms extracted were imported into the *Reduce and Visualize Gene Ontology*  
530 (*REVIGO*) web server [59] using default parameters with *P. falciparum* as the chosen database for term  
531 size. The resulting output file containing summarized GO terms (redundant terms removed) was  
532 visualized in Cytoscape (v3.8.0) [60]. Nodes were sized according to GO term uniqueness (i.e. fewer  
533 redundant terms merged with more general, higher-order terms). Nodes were coloured by fold-change  
534 up (red) or down (blue) when compared between lifecycle stages or resistant versus sensitive parasites.

535

536 **Data availability**

537 All the raw data (DDA) and search result files (MaxQuant excel output) used to generate the  
538 *P. falciparum* spectral library have been deposited in the ProteomeXchange Consortium through the  
539 PRIDE partner repository [61] with identifier PXD027241. Username: [reviewer\\_pxd027301@ebi.ac.uk](mailto:reviewer_pxd027301@ebi.ac.uk),  
540 Password: 3ipGw3QW

541 The raw data (DIA-MS) files generated in this study for quantitative analysis and their Spectronaut  
542 protein intensity have been deposited in the ProteomeXchange Consortium through the PRIDE partner  
543 repository [61] with identifier PXD027301. Username: [reviewer\\_pxd027301@ebi.ac.uk](mailto:reviewer_pxd027301@ebi.ac.uk), Password:  
544 PVoT5T3C

545 **Availability of supporting data**

546 Venn diagrams depicting overlaps of identified proteins by data-dependent acquisition; Venn diagram  
547 comparison and hierarchical cluster analysis of differentially expressed proteins; Volcano plot of  
548 differential protein abundance from 2064 identified *P. falciparum* proteins;  
549 Supplementary\_data\_sheet\_1-Protein intensities of Spectral library

550 Supplementary\_data\_sheet\_2-Comparison of Spectral library to PlasmoDB

551 Supplementary\_data\_sheet\_3-Number of proteolytic peptides per protein from Spectral library

552 Supplementary\_data\_sheet\_4-Protein intensities for DIA experiments

553 Supplementary\_data\_sheet\_5-Comparison of protein expression of Exp 1 to Exp 2

554 Supplementary\_data\_sheet\_6-GOterms of differentially expressed proteins

555 Supplementary\_data\_sheet\_7-Protein intensities for DIA experiments - Artemisinin resistant Vs  
556 Sensitive

557 Supplementary\_data\_sheet\_8-Comparison of protein expression of to RNA levels



558 **List of abbreviations**

559 DDA: data dependent acquisition; RBC: red blood cells; iRBC: infected red blood cells; DIA: data-  
560 independent acquisition; uRBC: uninfected red blood cells; h.p.i: hours post invasion; ART:  
561 artemisinin; LC-MS/MS: liquid chromatography tandem mass spectrometry; *m/z*: mass-to-charge;  
562 Kelch13: PfKelch13; MS: mass spectrometry; CV: coefficient variation; PPI: protease and  
563 phosphatase inhibitors; *P. falciparum*: *Plasmodium falciparum*; TCA: trichloroacetic acid; formic  
564 acid: F.A; acetonitrile: ACN.

565 **Competing interests**

566 The authors declare that they have no competing interests.

567 **Authors' contributions**

568 G.S, A.D., A.E.S., C.B. performed the experiments. G.S. processed the data and analysed the results.  
569 G.S., C.A.M., A.D.S. and M.B.B. conducted further analysis of the results. G.S., A.D., A.E.S., C.B.,  
570 C.A.M., A.D.S., M.B.B., R.B.S., drafted the manuscript. T.G.C. and D.J.C. supervised the study. All  
571 authors revised and approved the final version of the manuscript.

572 **Acknowledgements**

573 The authors thank Professor David Fidock (Columbia University) for provision of the genetically  
574 modified Cam3.II<sup>R539T</sup>, Cam3.II<sup>C580Y</sup> and Cam3.II<sup>rev</sup> *P. falciparum* isolates. The Monash Proteomics and  
575 Metabolomics Facility (Parkville Node) provided technical assistance with metabolomics and  
576 proteomics experiments. The Australian Red Cross Blood Service in Melbourne donated human red  
577 blood cells for *in vitro* parasite cultivation (Deed 19-10VIC-06). At La Trobe University, use of human  
578 erythrocytes was approved by the La Trobe University Research Ethics Committee (ethics number  
579 HEC17- 013) and an Australian Red Cross Blood Service Agreement (Deed 19-05VIC-01). Funding  
580 support was provided by the Australian National Health and Medical Research Council (NHMRC)  
581 project grants #APP1128003 and #APP1160705 and fellowship to D.J.C. (#APP1148700). We also  
582 wish to acknowledge the traditional owners of the lands on which this project was conducted, the  
583 Wurundjeri People of the Kulin nation.

## References

1. WHO. *World Malaria Report 2019*. 2019. World Health Organization, Geneva.
2. Gilles HM. Bruce-Chwatt's essential malariology. 3rd ed. / Herbert M. Gilles, David A. Warrell. ed. London: London : E. Arnold; 1993.
3. Cowman AF and Crabb BS. Invasion of red blood cells by malaria parasites. *Cell*. 2006;124 4:755-66. doi:10.1016/j.cell.2006.02.006.
4. Abkarian M, Massiera G, Berry L, Roques M and Braun-Breton C. A novel mechanism for egress of malarial parasites from red blood cells. *Blood*. 2011;117 15:4118-24. doi:10.1182/blood-2010-08-299883.
5. Amato R, Pearson RD, Almagro-Garcia J, Amaratunga C, Lim P, Suon S, et al. Origins of the current outbreak of multidrug-resistant malaria in southeast Asia: a retrospective genetic study. *Lancet Infect Dis*. 2018;18 3:337-45. doi:10.1016/S1473-3099(18)30068-9.
6. Imwong M, Hien TT, Thuy-Nhien NT, Dondorp AM and White NJ. Spread of a single multidrug resistant malaria parasite lineage (PfPailin) to Vietnam. *Lancet Infect Dis*. 2017;17 10:1022-3. doi:10.1016/S1473-3099(17)30524-8.
7. Uwimana A, Legrand E, Stokes BH, Ndikumana JM, Warsame M, Umulisa N, et al. Emergence and clonal expansion of in vitro artemisinin-resistant *Plasmodium falciparum* kelch13 R561H mutant parasites in Rwanda. *Nat Med*. 2020;26 10:1602-8. doi:10.1038/s41591-020-1005-2.
8. Ideker T, Thorsson V, Ranish JA, Christmas R, Buhler J, Eng JK, et al. Integrated genomic and proteomic analyses of a systematically perturbed metabolic network. *Science*. 2001;292 5518:929-34. doi:10.1126/science.292.5518.929.
9. Griffin TJ, Gygi SP, Ideker T, Rist B, Eng J, Hood L, et al. Complementary profiling of gene expression at the transcriptome and proteome levels in *Saccharomyces cerevisiae*. *Mol Cell Proteomics*. 2002;1 4:323-33. doi:10.1074/mcp.m200001-mcp200.
10. Baliga NS, Pan M, Goo YA, Yi EC, Goodlett DR, Dimitrov K, et al. Coordinate regulation of energy transduction modules in *Halobacterium* sp. analyzed by a global systems approach. *Proceedings of the National Academy of Sciences*. 2002;99 23:14913. doi:10.1073/pnas.192558999.
11. Gygi SP, Rist B, Gerber SA, Turecek F, Gelb MH and Aebersold R. Quantitative analysis of complex protein mixtures using isotope-coded affinity tags. *Nat Biotechnol*. 1999;17 10:994-9. doi:10.1038/13690.
12. Foth BJ, Zhang N, Chaal BK, Sze SK, Preiser PR and Bozdech Z. Quantitative time-course profiling of parasite and host cell proteins in the human malaria parasite *Plasmodium falciparum*. *Mol Cell Proteomics*. 2011;10 8:M110.006411. doi:10.1074/mcp.M110.006411.
13. Pandya NJ, Klaassen RV, van der Schors RC, Slotman JA, Houtsmuller A, Smit AB, et al. Group 1 metabotropic glutamate receptors 1 and 5 form a protein complex in mouse hippocampus and cortex. *Proteomics*. 2016;16 20:2698-705. doi:10.1002/pmic.201500400.
14. Hondius DC, van Nierop P, Li KW, Hoozemans JJ, van der Schors RC, van Haastert ES, et al. Profiling the human hippocampal proteome at all pathologic stages of Alzheimer's disease. *Alzheimers Dement*. 2016;12 6:654-68. doi:10.1016/j.jalz.2015.11.002.
15. Liu H, Sadygov RG and Yates JR, 3rd. A model for random sampling and estimation of relative protein abundance in shotgun proteomics. *Anal Chem*. 2004;76 14:4193-201. doi:10.1021/ac0498563.
16. Michalski A, Damoc E, Hauschild JP, Lange O, Wieghaus A, Makarov A, et al. Mass spectrometry-based proteomics using Q Exactive, a high-performance benchtop quadrupole Orbitrap mass spectrometer. *Mol Cell Proteomics*. 2011;10 9:M111.011015. doi:10.1074/mcp.M111.011015.
17. Gillet LC, Navarro P, Tate S, Rost H, Selevsek N, Reiter L, et al. Targeted data extraction of the MS/MS spectra generated by data-independent acquisition: a new concept for consistent

- and accurate proteome analysis. *Mol Cell Proteomics*. 2012;11 6:O111 016717. doi:10.1074/mcp.O111.016717.
18. Ludwig C, Gillet L, Rosenberger G, Amon S, Collins BC and Aebersold R. Data-independent acquisition-based SWATH-MS for quantitative proteomics: a tutorial. *Mol Syst Biol*. 2018;14 8:e8126. doi:10.15252/msb.20178126.
  19. Rosenberger G, Koh CC, Guo T, Röst HL, Kouvonen P, Collins BC, et al. A repository of assays to quantify 10,000 human proteins by SWATH-MS. *Scientific Data*. 2014;1:140031. doi:10.1038/sdata.2014.31.
  20. Fabre B, Korona D, Mata CI, Parsons HT, Deery MJ, Hertog MLATM, et al. Spectral Libraries for SWATH-MS Assays for *Drosophila melanogaster* and *Solanum lycopersicum*. *PROTEOMICS*. 2017;17 21:1700216. doi:10.1002/pmic.201700216.
  21. Blattmann P, Stutz V, Lizzo G, Richard J, Gut P and Aebersold R. Generation of a zebrafish SWATH-MS spectral library to quantify 10,000 proteins. *Scientific Data*. 2019;6:190011. doi:10.1038/sdata.2019.11.
  22. Boddey JA, Moritz RL, Simpson RJ and Cowman AF. Role of the *Plasmodium* export element in trafficking parasite proteins to the infected erythrocyte. *Traffic*. 2009;10 3:285-99. doi:10.1111/j.1600-0854.2008.00864.x.
  23. Straimer J, Gnädig NF, Witkowski B, Amaratunga C, Duru V, Ramadani AP, et al. Drug resistance. K13-propeller mutations confer artemisinin resistance in *Plasmodium falciparum* clinical isolates. *Science (New York, NY)*. 2015;347 6220:428-31. doi:10.1126/science.1260867.
  24. Siddiqui G, Srivastava A, Russell AS and Creek DJ. Multi-omics Based Identification of Specific Biochemical Changes Associated With PfKelch13-Mutant Artemisinin-Resistant *Plasmodium falciparum*. *J Infect Dis*. 2017;215 9:1435-44. doi:10.1093/infdis/jix156.
  25. Aurrecochea C, Brestelli J, Brunk BP, Dommer J, Fischer S, Gajria B, et al. PlasmoDB: a functional genomic database for malaria parasites. *Nucleic Acids Res*. 2009;37 Database issue:D539-43. doi:10.1093/nar/gkn814.
  26. Toenhake CG, Fraschka SA, Vijayabaskar MS, Westhead DR, van Heeringen SJ and Bartfai R. Chromatin Accessibility-Based Characterization of the Gene Regulatory Network Underlying *Plasmodium falciparum* Blood-Stage Development. *Cell Host Microbe*. 2018;23 4:557-69 e9. doi:10.1016/j.chom.2018.03.007.
  27. Lopez-Barragan MJ, Lemieux J, Quinones M, Williamson KC, Molina-Cruz A, Cui K, et al. Directional gene expression and antisense transcripts in sexual and asexual stages of *Plasmodium falciparum*. *BMC Genomics*. 2011;12:587. doi:10.1186/1471-2164-12-587.
  28. Zanghi G, Vembar SS, Baumgarten S, Ding S, Guizetti J, Bryant JM, et al. A Specific PfEMP1 Is Expressed in *P. falciparum* Sporozoites and Plays a Role in Hepatocyte Infection. *Cell Rep*. 2018;22 11:2951-63. doi:10.1016/j.celrep.2018.02.075.
  29. Yang T, Yeoh LM, Tutor MV, Dixon MW, McMillan PJ, Xie SC, et al. Decreased K13 Abundance Reduces Hemoglobin Catabolism and Proteotoxic Stress, Underpinning Artemisinin Resistance. *Cell reports*. 2019;29 9:2917-28. e5.
  30. Birnbaum J, Scharf S, Schmidt S, Jonscher E, Hoeijmakers WAM, Flemming S, et al. A Kelch13-defined endocytosis pathway mediates artemisinin resistance in malaria parasites. *Science*. 2020;367 6473:51-9. doi:10.1126/science.aax4735.
  31. Birrell GW, Challis MP, De Paoli A, Anderson D, Devine SM, Heffernan GD, et al. Multi-omic Characterization of the Mode of Action of a Potent New Antimalarial Compound, JPC-3210, Against *Plasmodium falciparum*. *Mol Cell Proteomics*. 2020;19 2:308-25. doi:10.1074/mcp.RA119.001797.
  32. Pease BN, Huttlin EL, Jedrychowski MP, Talevich E, Harmon J, Dillman T, et al. Global analysis of protein expression and phosphorylation of three stages of *Plasmodium falciparum* intraerythrocytic development. *J Proteome Res*. 2013;12 9:4028-45. doi:10.1021/pr400394g.

33. Oehring SC, Woodcroft BJ, Moes S, Wetzel J, Dietz O, Pulfer A, et al. Organellar proteomics reveals hundreds of novel nuclear proteins in the malaria parasite *Plasmodium falciparum*. *Genome Biol.* 2012;13 11:R108. doi:10.1186/gb-2012-13-11-r108.
34. Davies H, Belda H, Broncel M, Ye X, Bisson C, Introini V, et al. An exported kinase family mediates species-specific erythrocyte remodelling and virulence in human malaria. *Nat Microbiol.* 2020;5 6:848-63. doi:10.1038/s41564-020-0702-4.
35. Giannangelo C, Siddiqui G, De Paoli A, Anderson BM, Edgington-Mitchell LE, Charman SA, et al. System-wide biochemical analysis reveals ozonide antimalarials initially act by disrupting &Plasmodium falciparum& haemoglobin digestion. *bioRxiv.* 2020:2020.03.23.003376. doi:10.1101/2020.03.23.003376.
36. Rujimongkon K, Mungthin M, Tummatorn J, Ampawong S, Adisakwattana P, Boonyuen U, et al. Proteomic analysis of *Plasmodium falciparum* response to isocryptolepine derivative. *PLOS ONE.* 2019;14 8:e0220871. doi:10.1371/journal.pone.0220871.
37. Dogovski C, Xie SC, Burgio G, Bridgford J, Mok S, McCaw JM, et al. Targeting the cell stress response of *Plasmodium falciparum* to overcome artemisinin resistance. *PLoS biology.* 2015;13 4.
38. Searle BC, Pino LK, Egertson JD, Ting YS, Lawrence RT, MacLean BX, et al. Chromatogram libraries improve peptide detection and quantification by data independent acquisition mass spectrometry. *Nat Commun.* 2018;9 1:5128. doi:10.1038/s41467-018-07454-w.
39. Gnädig NF, Stokes BH, Edwards RL, Kalantarov GF, Heimsch KC, Kuderjavy M, et al. Insights into the intracellular localization, protein associations and artemisinin resistance properties of *Plasmodium falciparum* K13. *PLOS Pathogens.* 2020;16 4:e1008482. doi:10.1371/journal.ppat.1008482.
40. Jimenez-Ruiz E, Morlon-Guyot J, Daher W and Meissner M. Vacuolar protein sorting mechanisms in apicomplexan parasites. *Mol Biochem Parasitol.* 2016;209 1-2:18-25. doi:10.1016/j.molbiopara.2016.01.007.
41. Morse D, Webster W, Kalanon M, Langsley G and McFadden GI. *Plasmodium falciparum* Rab1A Localizes to Rhoptries in Schizonts. *PLoS One.* 2016;11 6:e0158174. doi:10.1371/journal.pone.0158174.
42. Cowman AF, Berry D and Baum J. The cellular and molecular basis for malaria parasite invasion of the human red blood cell. *J Cell Biol.* 2012;198 6:961-71. doi:10.1083/jcb.201206112.
43. Elliott DA, McIntosh MT, Hosgood HD, 3rd, Chen S, Zhang G, Baeovova P, et al. Four distinct pathways of hemoglobin uptake in the malaria parasite *Plasmodium falciparum*. *Proc Natl Acad Sci U S A.* 2008;105 7:2463-8. doi:10.1073/pnas.0711067105.
44. Bunnik EM, Chung DW, Hamilton M, Ponts N, Saraf A, Prudhomme J, et al. Polysome profiling reveals translational control of gene expression in the human malaria parasite *Plasmodium falciparum*. *Genome Biol.* 2013;14 11:R128. doi:10.1186/gb-2013-14-11-r128.
45. Caro F, Ahyong V, Betegon M and DeRisi JL. Genome-wide regulatory dynamics of translation in the *Plasmodium falciparum* asexual blood stages. *Elife.* 2014;3 doi:10.7554/eLife.04106.
46. Pavlovic Djuranovic S, Erath J, Andrews RJ, Bayguinov PO, Chung JJ, Chalker DL, et al. *Plasmodium falciparum* translational machinery condones polyadenosine repeats. *Elife.* 2020;9 doi:10.7554/eLife.57799.
47. Matthews H, Duffy CW and Merrick CJ. Checks and balances? DNA replication and the cell cycle in *Plasmodium*. *Parasit Vectors.* 2018;11 1:216. doi:10.1186/s13071-018-2800-1.
48. Bozdech Z, Llinas M, Pulliam BL, Wong ED, Zhu J and DeRisi JL. The transcriptome of the intraerythrocytic developmental cycle of *Plasmodium falciparum*. *PLoS Biol.* 2003;1 1:E5. doi:10.1371/journal.pbio.0000005.
49. Le Roch KG, Johnson JR, Florens L, Zhou Y, Santrosyan A, Grainger M, et al. Global analysis of transcript and protein levels across the *Plasmodium falciparum* life cycle. *Genome Res.* 2004;14 11:2308-18. doi:10.1101/gr.2523904.

50. Cui L, Lindner S and Miao J. Translational regulation during stage transitions in malaria parasites. *Ann N Y Acad Sci.* 2015;1342:1-9. doi:10.1111/nyas.12573.
51. Adderley JD, John von Freyend S, Jackson SA, Bird MJ, Burns AL, Anar B, et al. Analysis of erythrocyte signalling pathways during *Plasmodium falciparum* infection identifies targets for host-directed antimalarial intervention. *Nat Commun.* 2020;11 1:4015. doi:10.1038/s41467-020-17829-7.
52. Trager W and Jensen JB. Human malaria parasites in continuous culture. *Science.* 1976;193 4254:673-5.
53. Creek DJ, Chua HH, Cobbold SA, Nijagal B, MacRae JI, Dickerman BK, et al. Metabolomics-Based Screening of the Malaria Box Reveals both Novel and Established Mechanisms of Action. *Antimicrob Agents Chemother.* 2016;60 11:6650-63. doi:10.1128/AAC.01226-16.
54. Tjhin ET, Spry C, Sewell AL, Hoegl A, Barnard L, Sexton AE, et al. Mutations in the pantothenate kinase of *Plasmodium falciparum* confer diverse sensitivity profiles to antiplasmodial pantothenate analogues. *PLOS Pathogens.* 2018;14 4:e1006918. doi:10.1371/journal.ppat.1006918.
55. Cobbold SA, Vaughan AM, Lewis IA, Painter HJ, Camargo N, Perlman DH, et al. Kinetic flux profiling elucidates two independent acetyl-CoA biosynthetic pathways in *Plasmodium falciparum*. *The Journal of biological chemistry.* 2013;288 51:36338-50. doi:10.1074/jbc.M113.503557.
56. Rappsilber J, Ishihama Y and Mann M. Stop and Go Extraction Tips for Matrix-Assisted Laser Desorption/Ionization, Nano-electrospray, and LC/MS Sample Pretreatment in Proteomics. *Analytical Chemistry.* 2003;75 3:663-70. doi:10.1021/ac026117i.
57. Escher C, Reiter L, MacLean B, Ossola R, Herzog F, Chilton J, et al. Using iRT, a normalized retention time for more targeted measurement of peptides. *Proteomics.* 2012;12 8:1111-21. doi:10.1002/pmic.201100463.
58. Chong J, Soufan O, Li C, Caraus I, Li S, Bourque G, et al. MetaboAnalyst 4.0: towards more transparent and integrative metabolomics analysis. *Nucleic Acids Research.* 2018;46 W1:W486-W94. doi:10.1093/nar/gky310.
59. Supek F, Bosnjak M, Skunca N and Smuc T. REVIGO summarizes and visualizes long lists of gene ontology terms. *PLoS One.* 2011;6 7:e21800. doi:10.1371/journal.pone.0021800.
60. Shannon P, Markiel A, Ozier O, Baliga NS, Wang JT, Ramage D, et al. Cytoscape: a software environment for integrated models of biomolecular interaction networks. *Genome Res.* 2003;13 11:2498-504. doi:10.1101/gr.1239303.
61. Perez-Riverol Y, Csordas A, Bai J, Bernal-Llinares M, Hewapathirana S, Kundu DJ, et al. The PRIDE database and related tools and resources in 2019: improving support for quantification data. *Nucleic Acids Res.* 2019;47 D1:D442-D50. doi:10.1093/nar/gky1106.

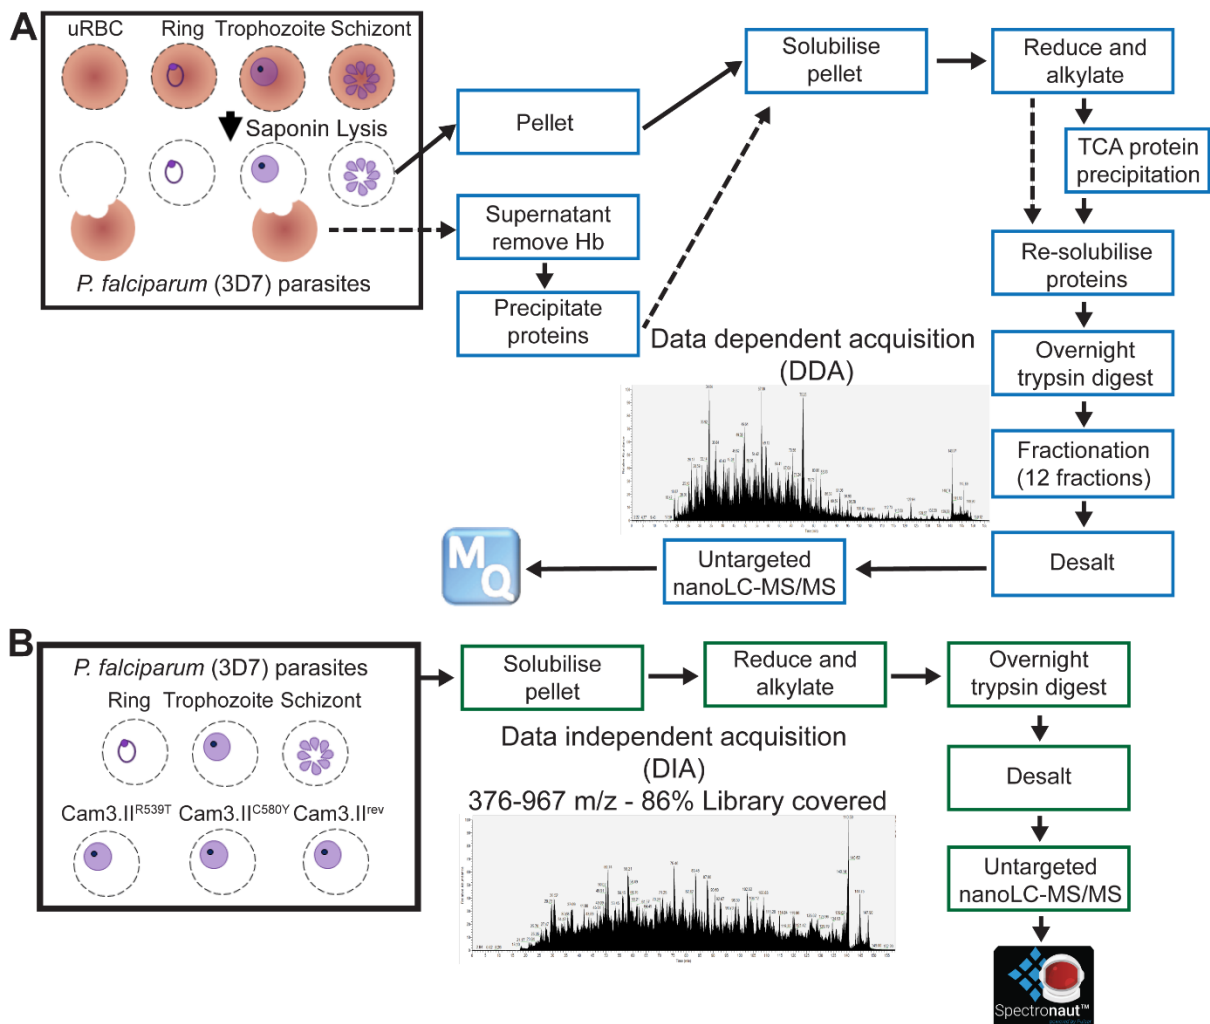

**Figure 1. Flow chart for creation and application of the spectral library for *Plasmodium falciparum* infected red blood cells.** (A) The spectral library (blue boxes) was built from uninfected red blood cells (uRBC), ring-, trophozoite- and schizont-stage (*P. falciparum* 3D7) parasites, where both the saponin pellets (solid arrows) and supernatants (dashed arrows) were combined (3-5 mg of proteins), trypsinised, fractionated extensively and data analysed using Maxquant. (B) The spectral library was then used to analyse samples (green boxes) from *P. falciparum* 3D7 parasites (ring-, trophozoite- and schizont-stage) and artemisinin resistant (Cam3.II<sup>R539T</sup>, Cam3.II<sup>C580Y</sup>) and sensitive (Cam3.II<sup>rev</sup>) parasites (saponin pellets only, 500 µg of proteins) over a window of 376-967 *m/z* covering 86% of the spectral library generated. The data was analysed using Spectronaut™.

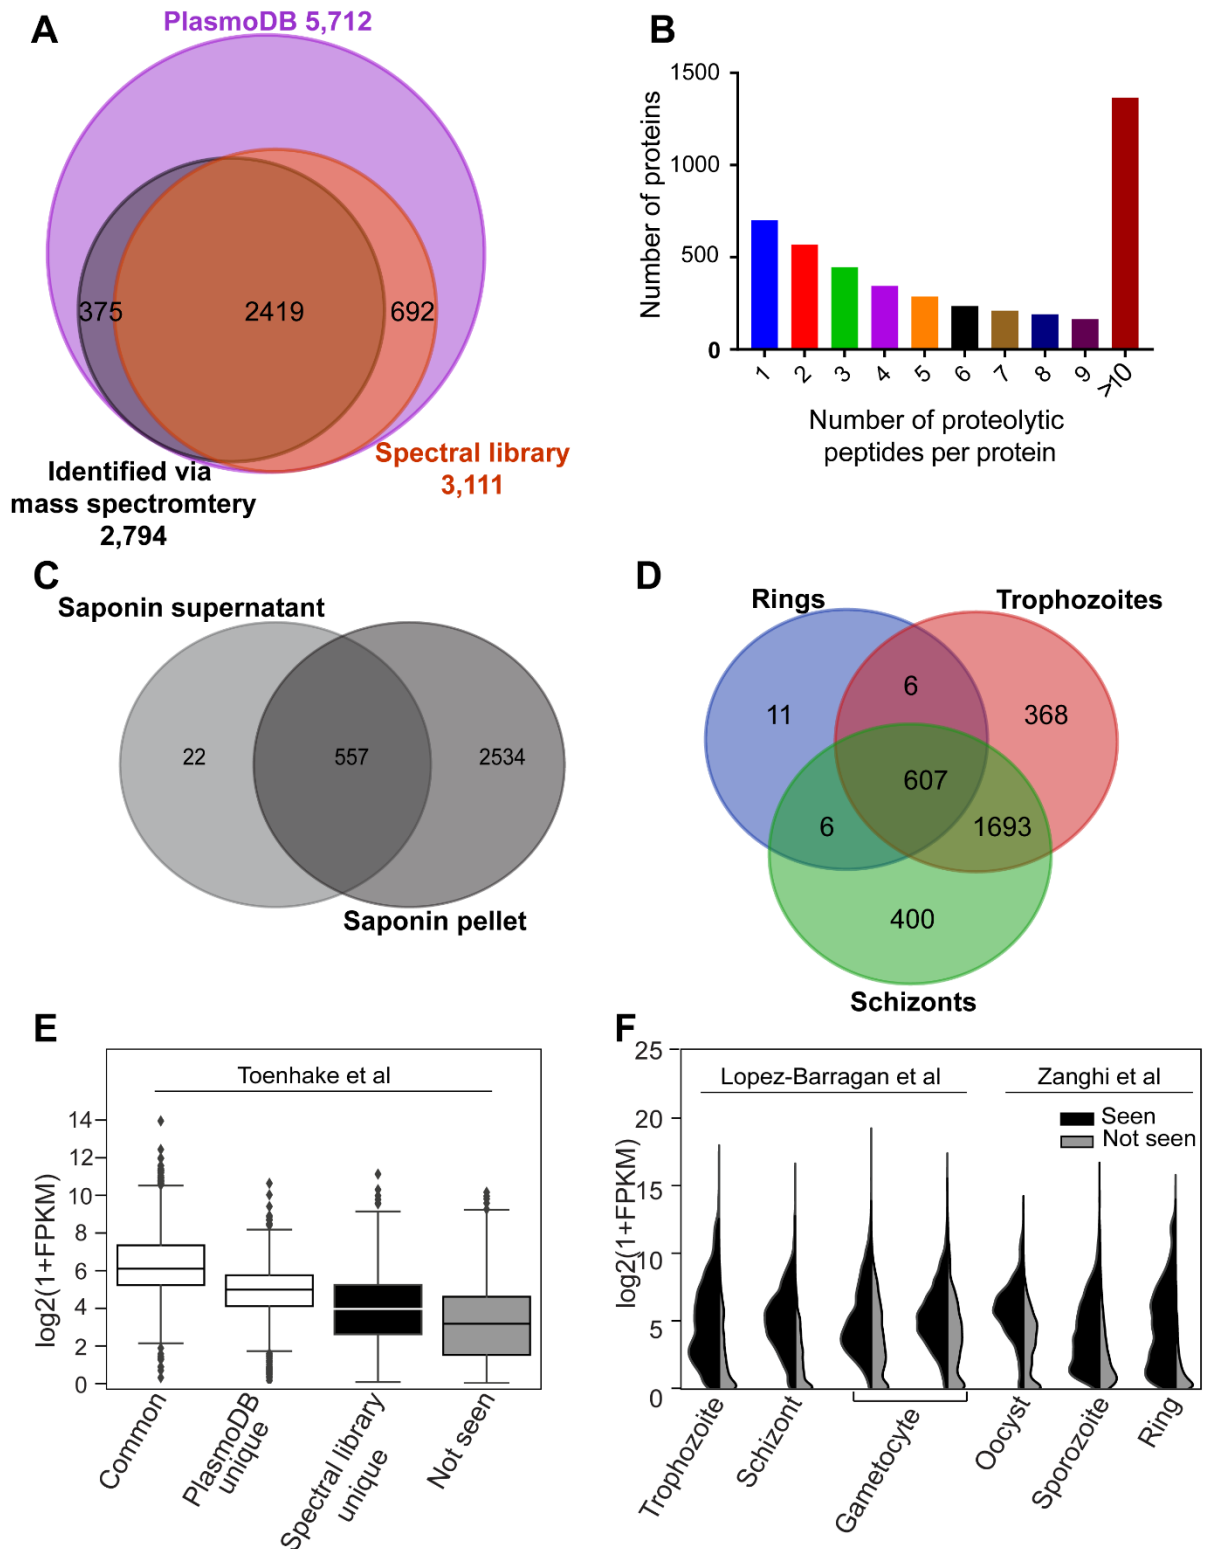

**Figure 2. Characterisation of *Plasmodium falciparum* asexual red blood cell stage spectral library.** (A) Venn diagram describing overlap of identified *P. falciparum* proteins from the generated spectral library (orange) with *P. falciparum* protein-encoding genes in PlasmoDB (purple), and PlasmoDB subset annotated with protein level evidence from mass spectrometry (black) (B) The number of proteotypic peptides per protein in the *P. falciparum* spectral library (C) Venn diagram of identified *P.*

*falciparum* proteins for spectral library generation from saponin soluble and insoluble fractions, and (D) of ring-, trophozoite- and schizont-stage parasites. (E) Box plot of FPKM distribution of transcript expression level from Toenhake *et al.* [26] dataset for genes common to spectral library and PlasmoDB (common), unique to PlasmoDB and spectral library, and not identified (not seen) with logarithmic values of FPKM on the vertical axis. (F) Violin plots displaying the expression intensity distribution of the genes from Lopez-Barragan *et al.* [27] and Zanghi *et al.* [28] datasets with products identified (seen) and not identified (not seen) in the *P. falciparum* spectral library across the distinct life cycle stages.



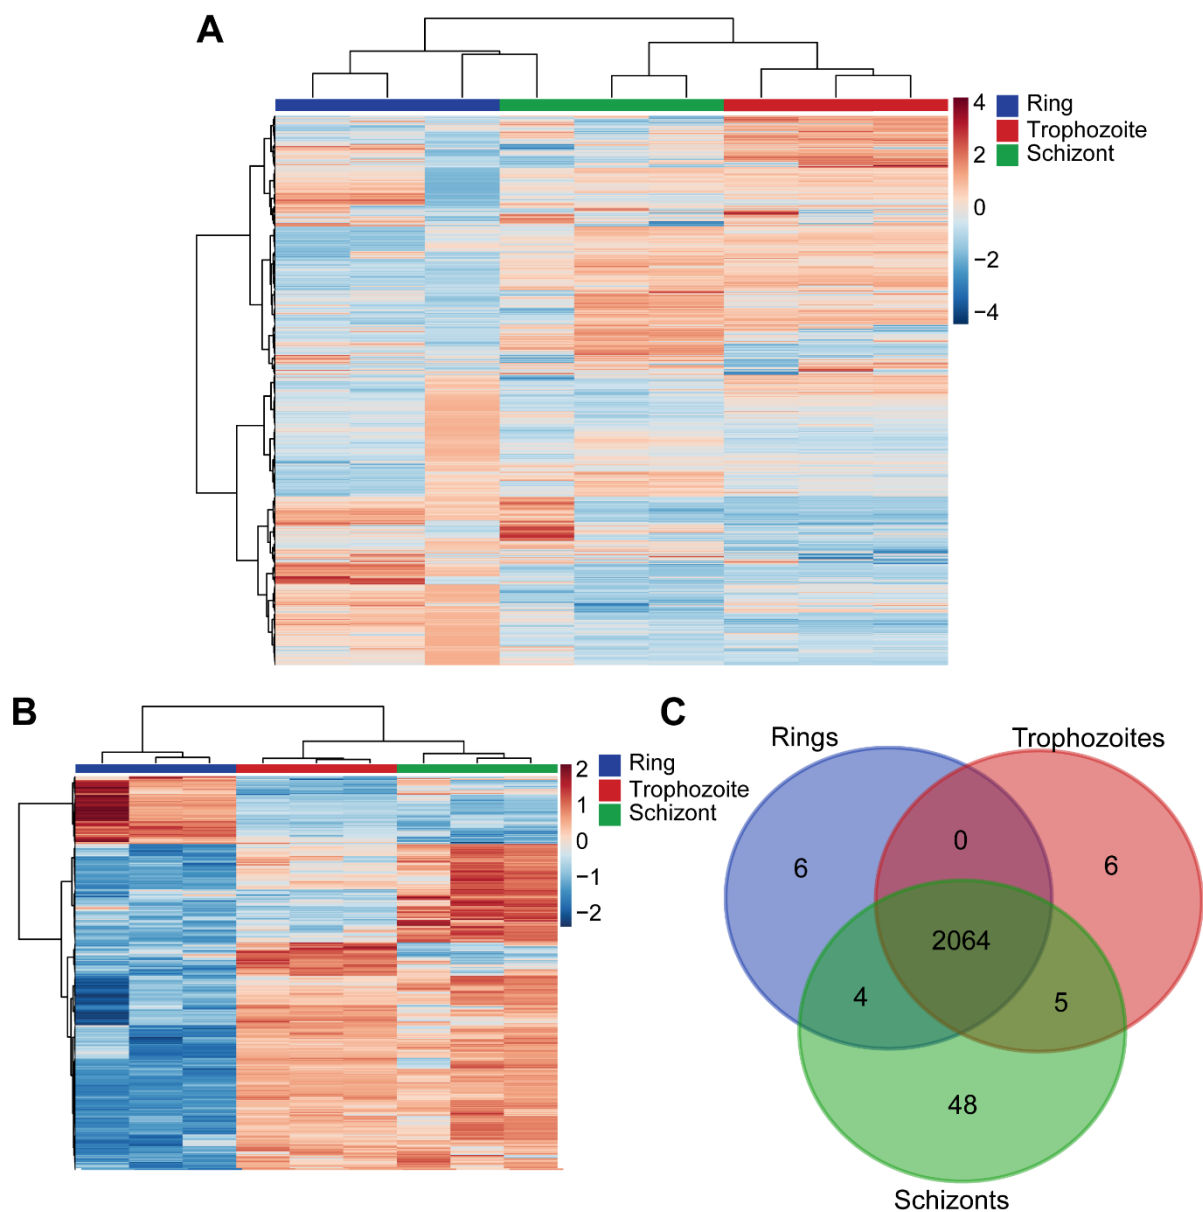

**Figure 3. Hierarchical clustering of *P. falciparum* proteins of ring- (blue), trophozoite- (red), and schizont-stage parasites (green).** Vertical clustering displays similarities between sample groups, while horizontal clusters reveal the relative abundances of all identified proteins (2064) (A) and the 400 (B) most significantly different proteins from DIA analysis. (C) Venn diagram of identified *P. falciparum* proteins in ring-, trophozoite- and schizont-stage parasites using the DIA-MS. Data shown is from three independent biological replicates. The colour scale bar represents  $\log_2$  (mean-centered and divided by the standard deviation of each variable) intensity values.

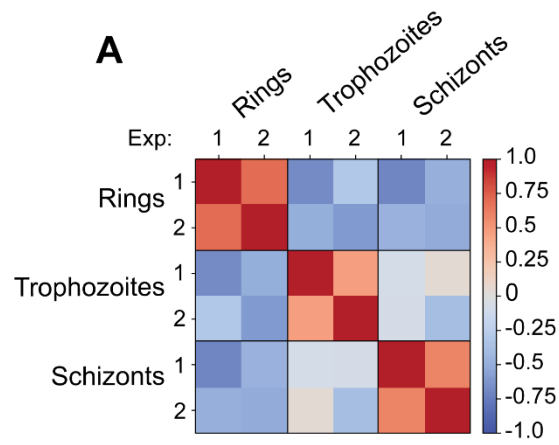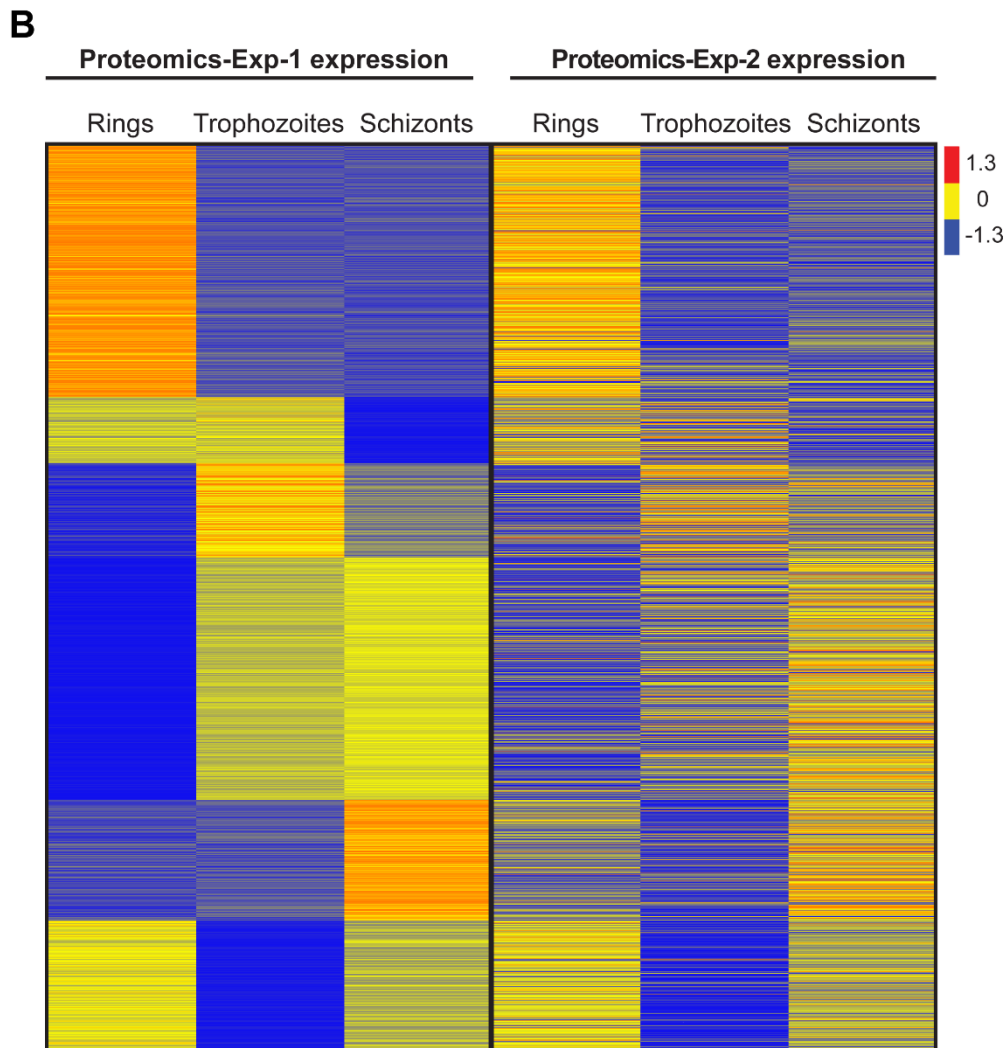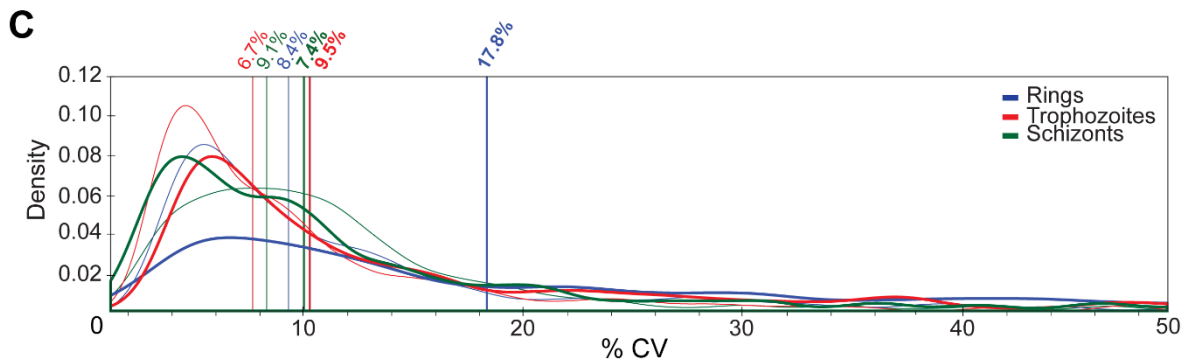

**Figure 4. Analysing stage specific DIA-MS data using the *P. falciparum* spectral library.** (A) Pearson correlation of average protein intensities in each specific stage (rings-, trophozoites- and schizont-stage parasites) identified in two experiments 1 and 2. (B) Heatmap of the *P. falciparum* average protein expression patterns of 1,990 common proteins from ring- to trophozoite- to schizont-stage parasites in experiment 1 and experiment 2. The left portion of heatmap represents proteomics data (experiment 1), and the right represents an independent proteomics data set (experiment 2). The colour code is as follows: red indicates up-regulated proteins; blue indicates down-regulated proteins; yellow indicates unchanged proteins. (C) Coefficient of Variation (%CV) of protein intensities in experiment 1 (n = 3) and experiment 2 (n = 2-3) for each of the distinct stages. Bold lines are experiment 2. Vertical lines indicate median %CV for each stage in each experiment.

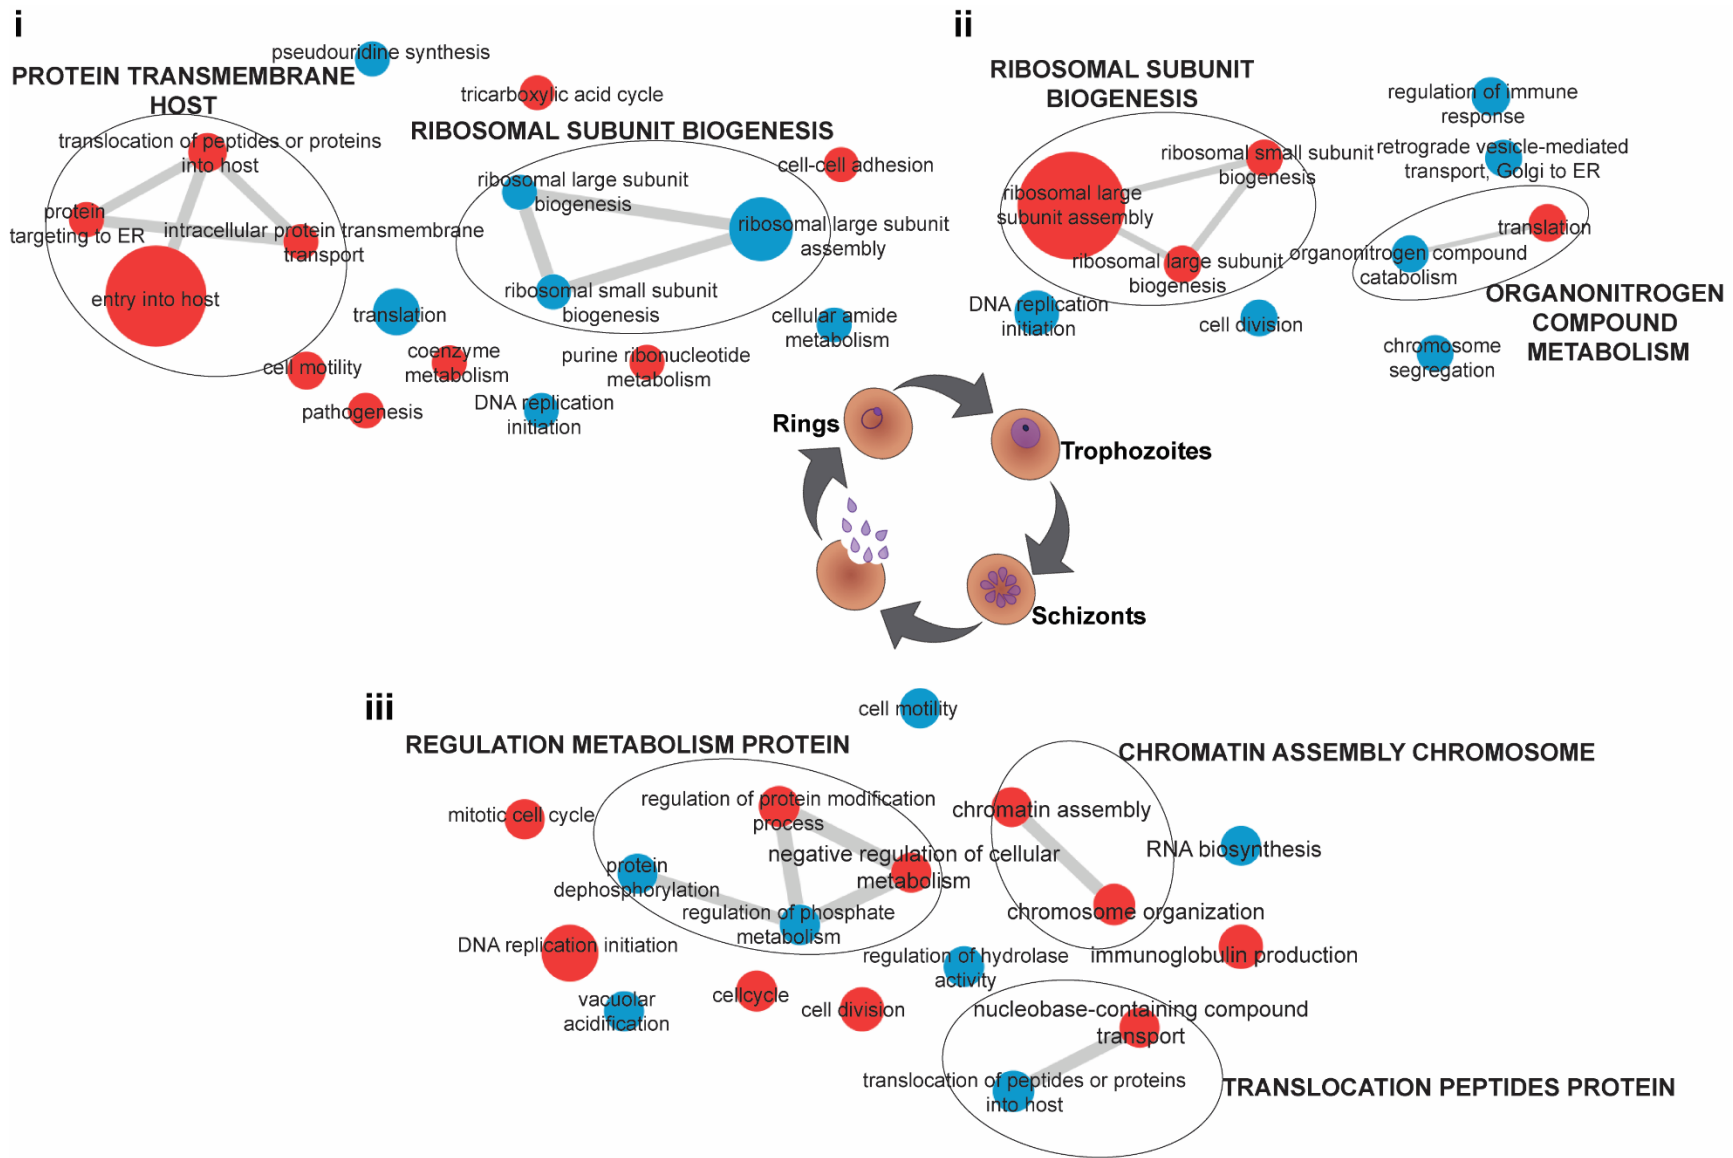

**Figure 5. Gene Ontology network analysis of processes enriched in the spectral library for each stage of asexual development.** Gene Ontology (GO) terms significantly overrepresented in the transition between the three distinct stages of the asexual development (**i**; schizont- to ring-stage parasites, **ii**; ring- to trophozoite-stage parasites, **iii**; trophozoite- to schizont-stage parasites transition) were obtained using in-house methods and imported into REVIGO for network compilation. Visualisation of network enrichment was performed using Cytoscape (v3.8.2). Each node is sized by increasing GO term uniqueness and coloured according whether the process is up (red) or down (blue) by comparison to the subsequent developmental stage. Grey bars connecting each node represent gene overlap between terms.

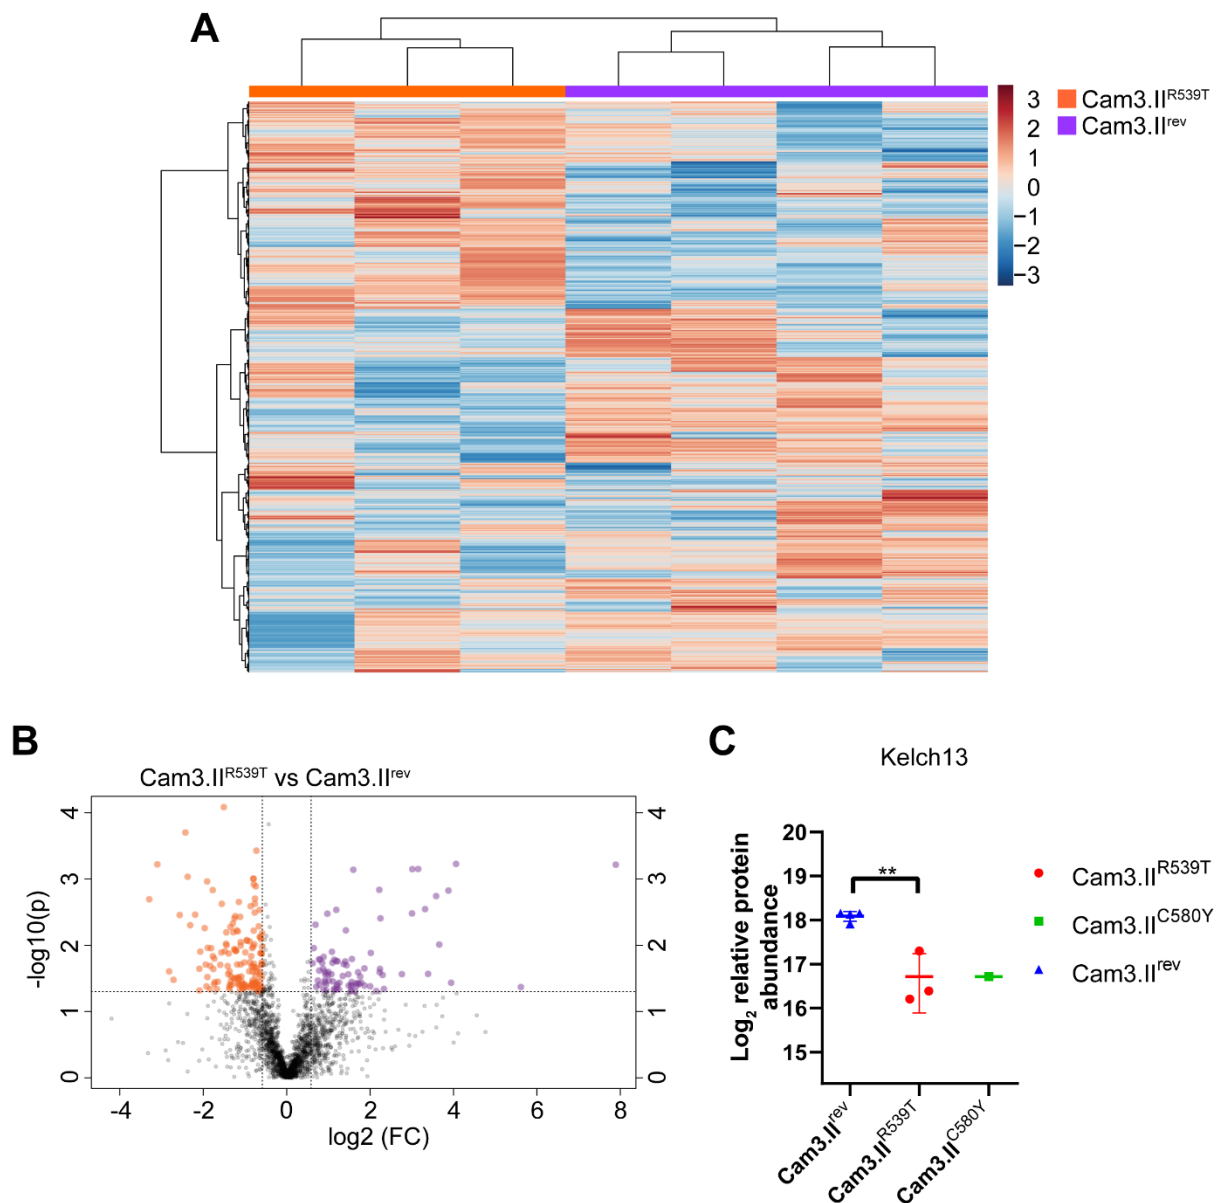

**Figure 6. DIA-MS analysis of artemisinin resistant (Cam3.II<sup>R539T</sup>) and sensitive (Cam3.II<sup>rev</sup>) parasites using the *P. falciparum* spectral library.** (A) Hierarchical clustering of the *P. falciparum* proteins of Cam3.II<sup>R539T</sup> (orange, n=3) and Cam3.II<sup>rev</sup> (purple, n=4). Vertical clustering displays similarities between sample groups, while horizontal clusters reveal the relative abundances of identified *P. falciparum* proteins (2,317). The colour scale bar represents log<sub>2</sub> (mean-centered and divided by the standard deviation of each variable) intensity values. (B) Volcano plot of differential protein abundance between Cam3.II<sup>R539T</sup> and Cam3.II<sup>rev</sup> parasites. Proteins above the significance threshold (p-value < 0.05) and fold change ≥ 1.5 are shown as orange (up-regulated in Cam3.II<sup>R539T</sup>) and purple (up-regulated in Cam3.II<sup>rev</sup>) dots. Data shown from at least three independent biological replicates. (C) Log<sub>2</sub> relative abundance (mean ± standard deviation) of PF3D7\_1343700 (Kelch13) in Cam3.II<sup>rev</sup>, Cam3.II<sup>R539T</sup>, and Cam3.II<sup>C580Y</sup>. \*\* p-value = 0.001.

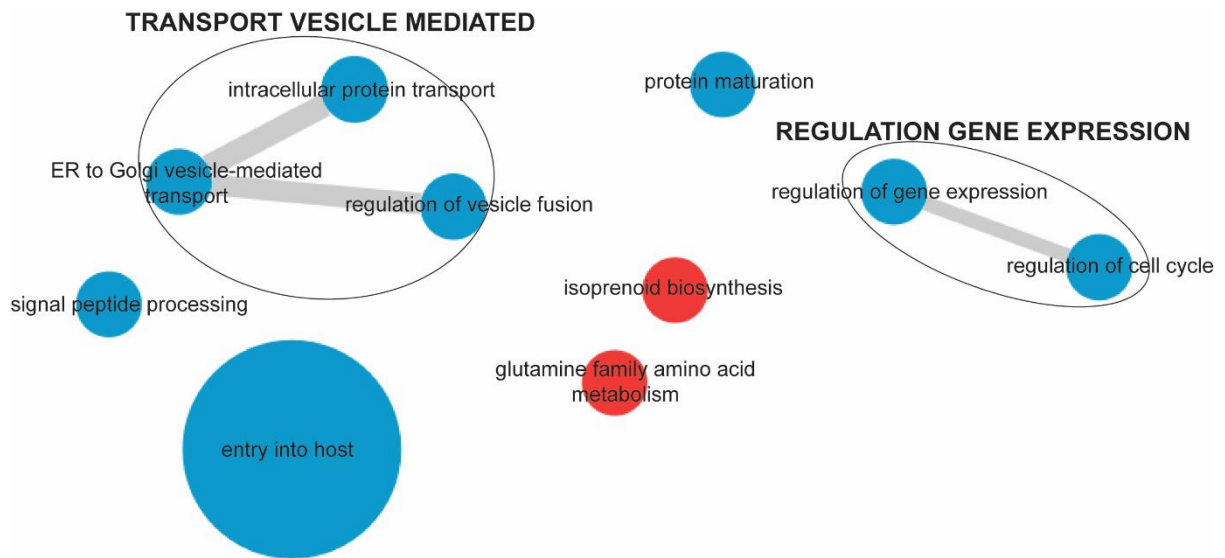

1

2

3 **Figure 7. Comparative enrichment analysis of trophozoite-stage artemisinin resistant**  
 4 **(Cam3.II<sup>R539T</sup>) and sensitive (Cam3.II<sup>rev</sup>) parasites.** Pathway enrichment networks were prepared  
 5 from significantly overrepresented GO terms obtained by in-house statistical methods. Nodes are sized  
 6 by increasing GO term uniqueness and coloured according to whether a process is up (red) or down  
 7 (blue) in resistant versus sensitive parasites.

8

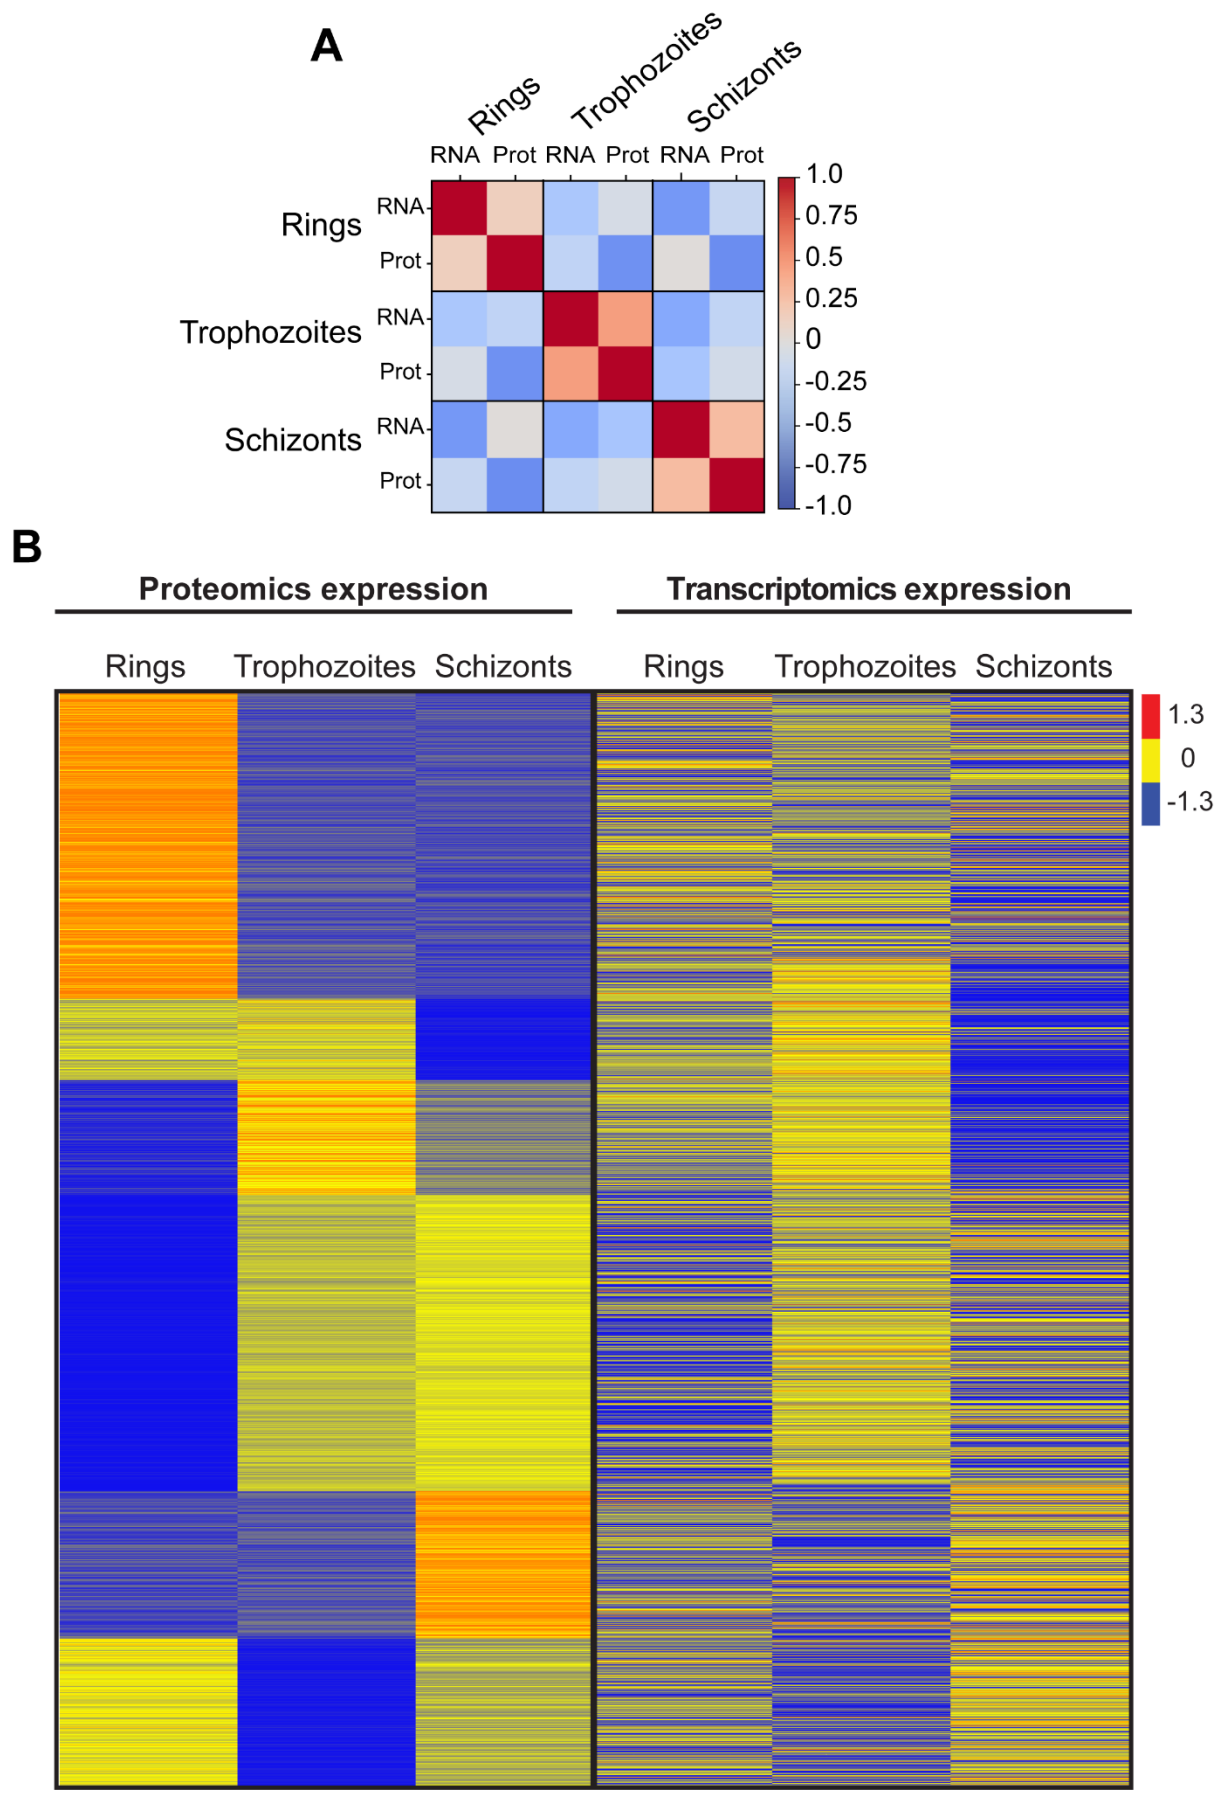

9

10 **Figure 8.** Heatmap of the *P. falciparum* gene and protein expression patterns from ring- to



11 **trophozoite- to schizont-stage parasites.** (A) Pearson correlation of average protein intensities (1990  
12 common proteins identified in Experiment 1 and 2) in each specific stage (rings-, trophozoites- and  
13 schizont-stage parasites) to RNA transcript abundance from Toenhake *et al.* [26]. (B) The left portion  
14 of heatmap represents proteomics data (DIA) of 1990 common proteins from ring- to trophozoite- to  
15 schizont-stage parasites in experiment 1 and experiment 2. While, the right represents transcriptomics  
16 data from Toenhake *et al.* [26]. The colour code is as follows: red indicates up-regulated proteins or  
17 transcripts; blue indicates down-regulated proteins or transcripts; yellow indicates unchanged proteins  
18 or transcripts.

19

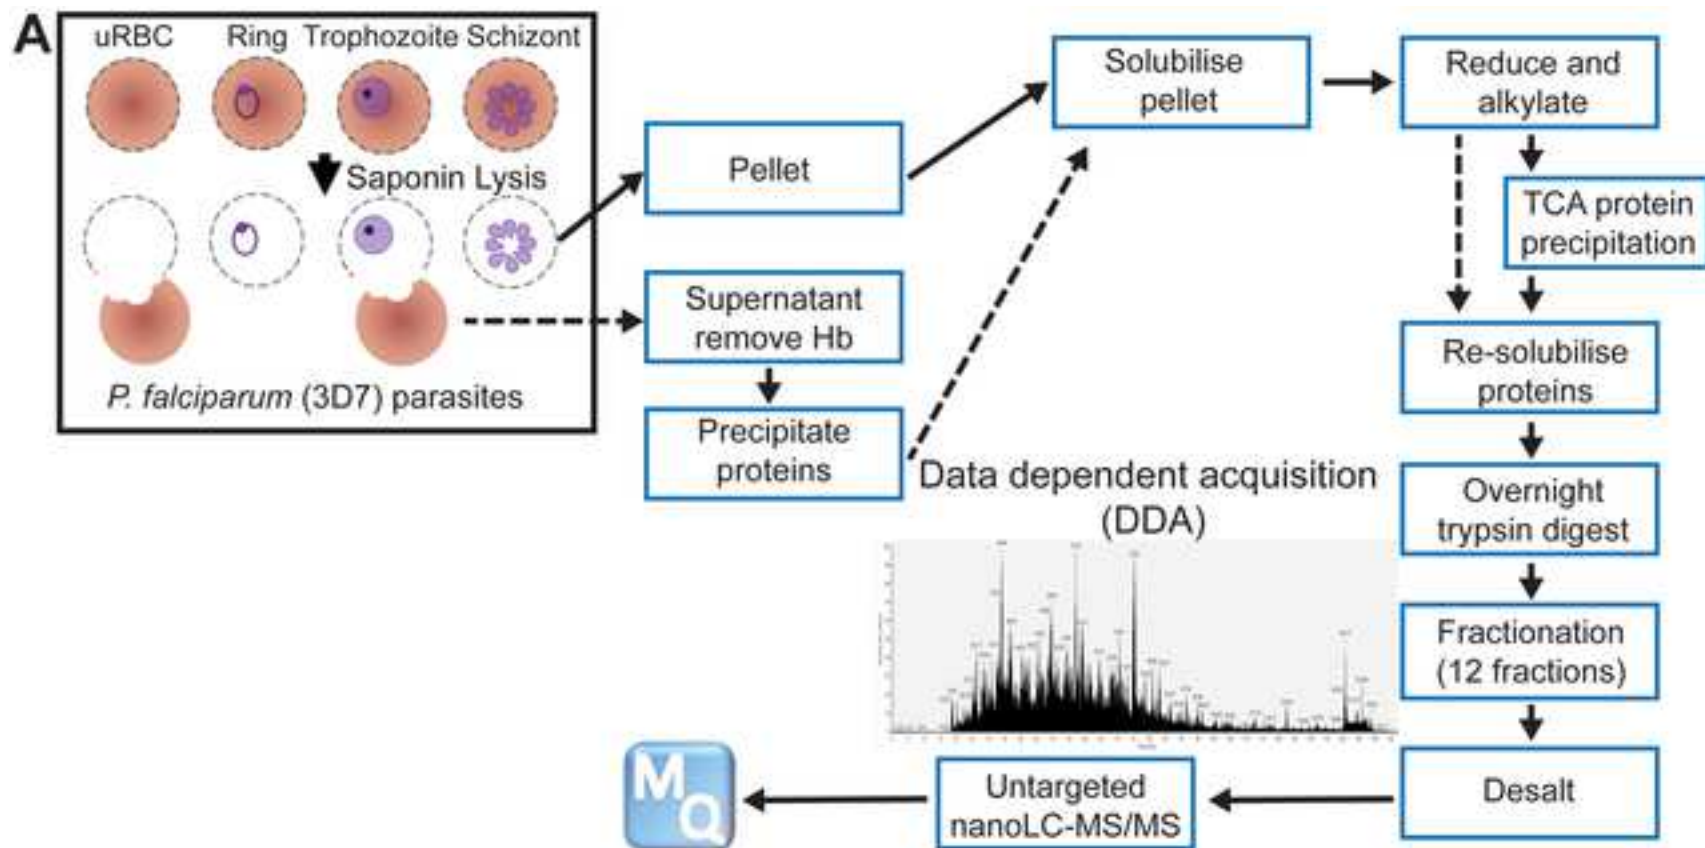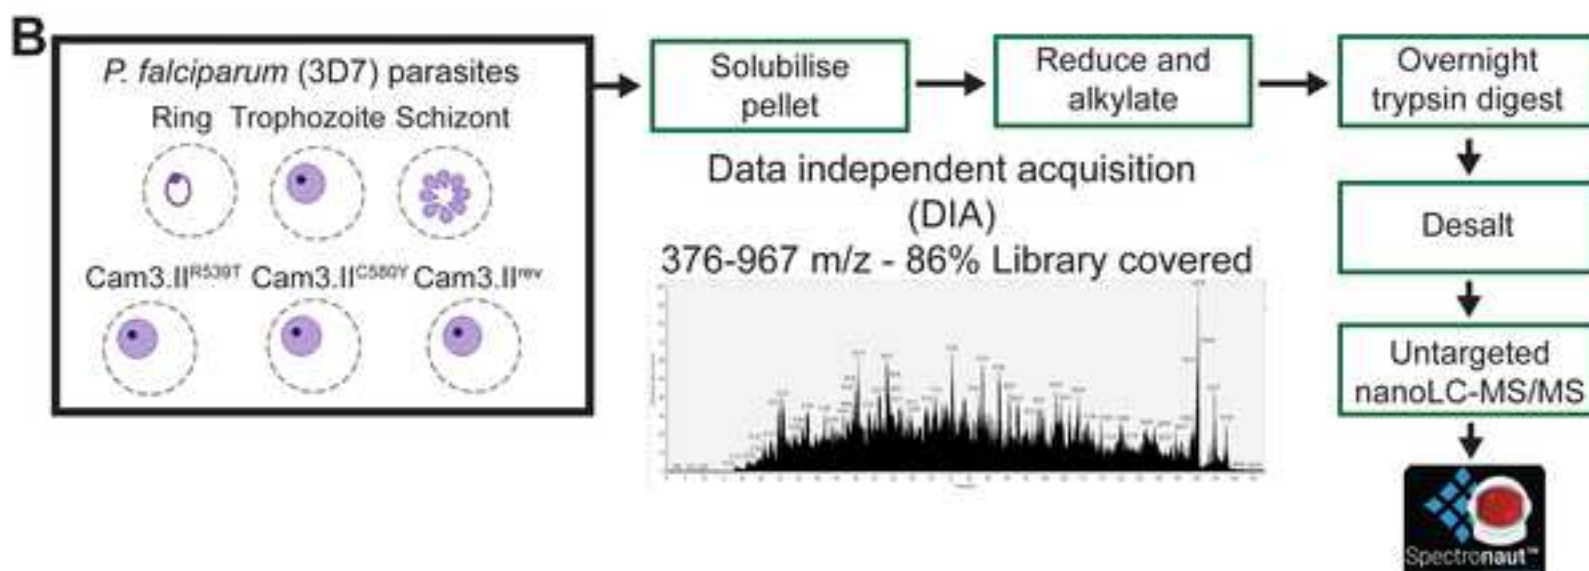

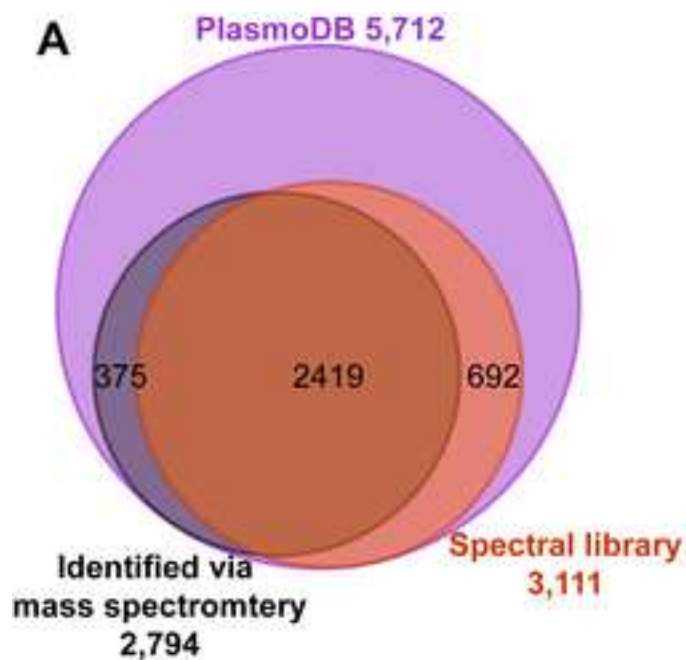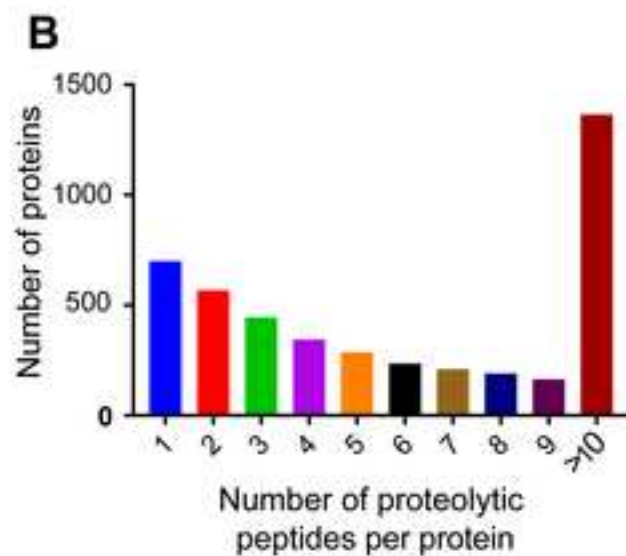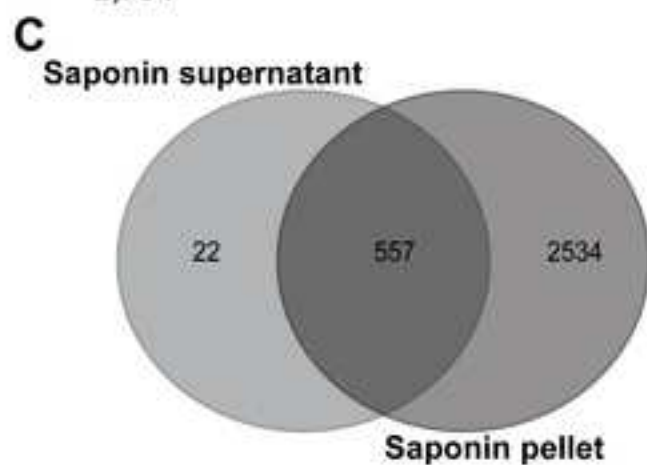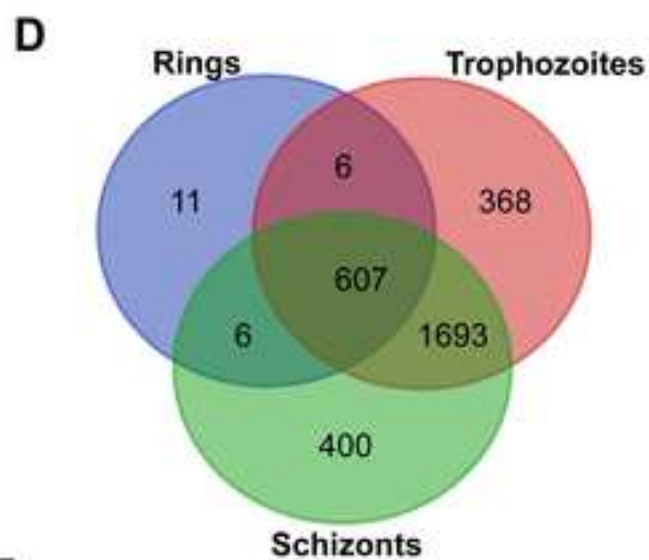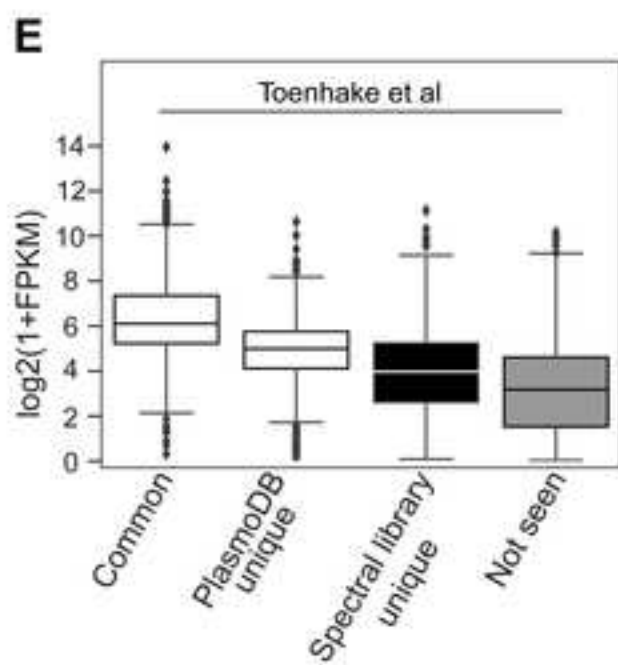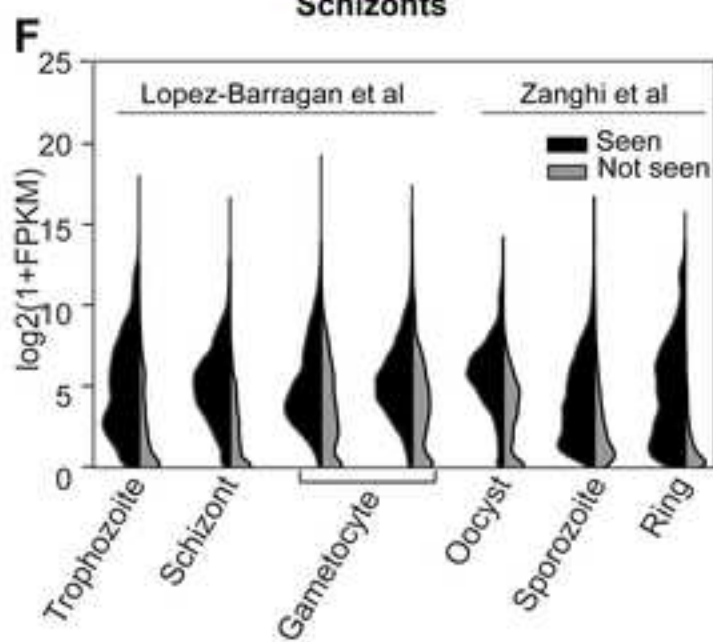

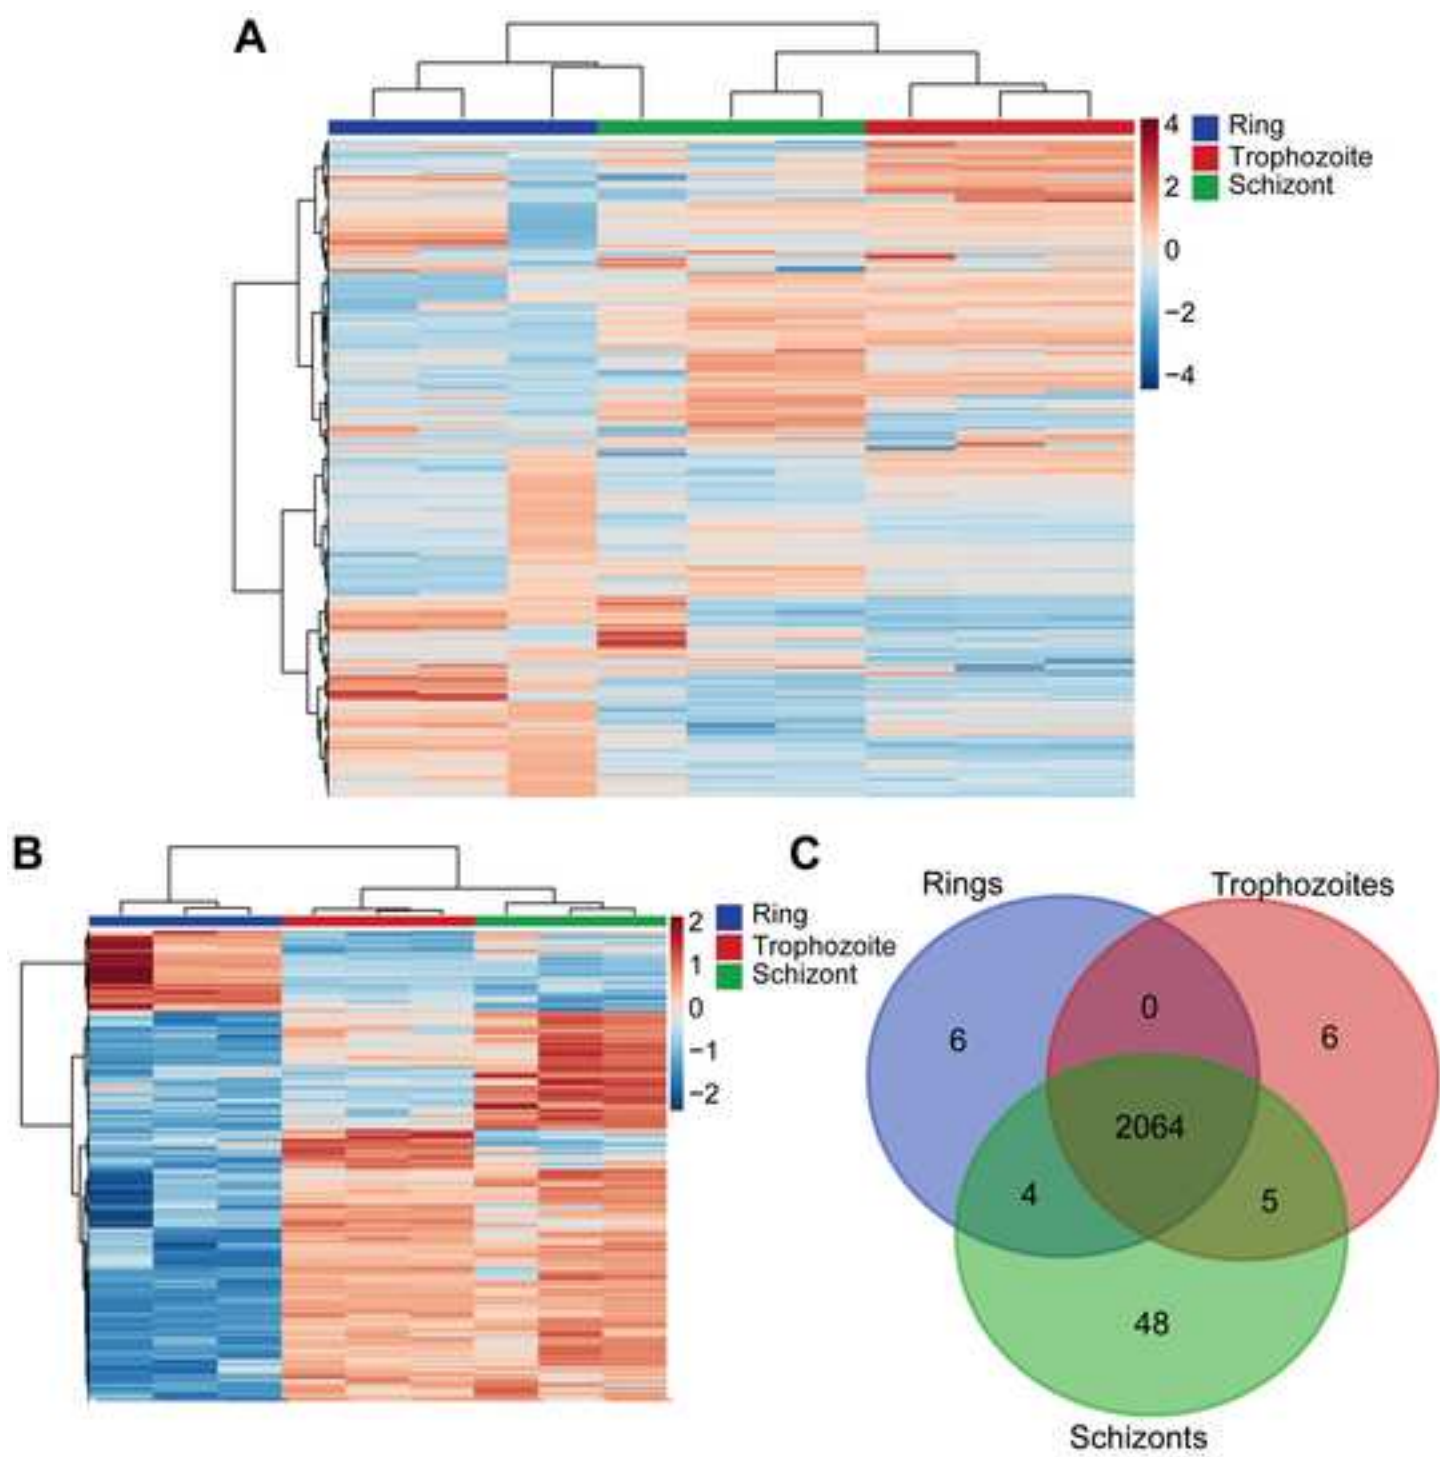

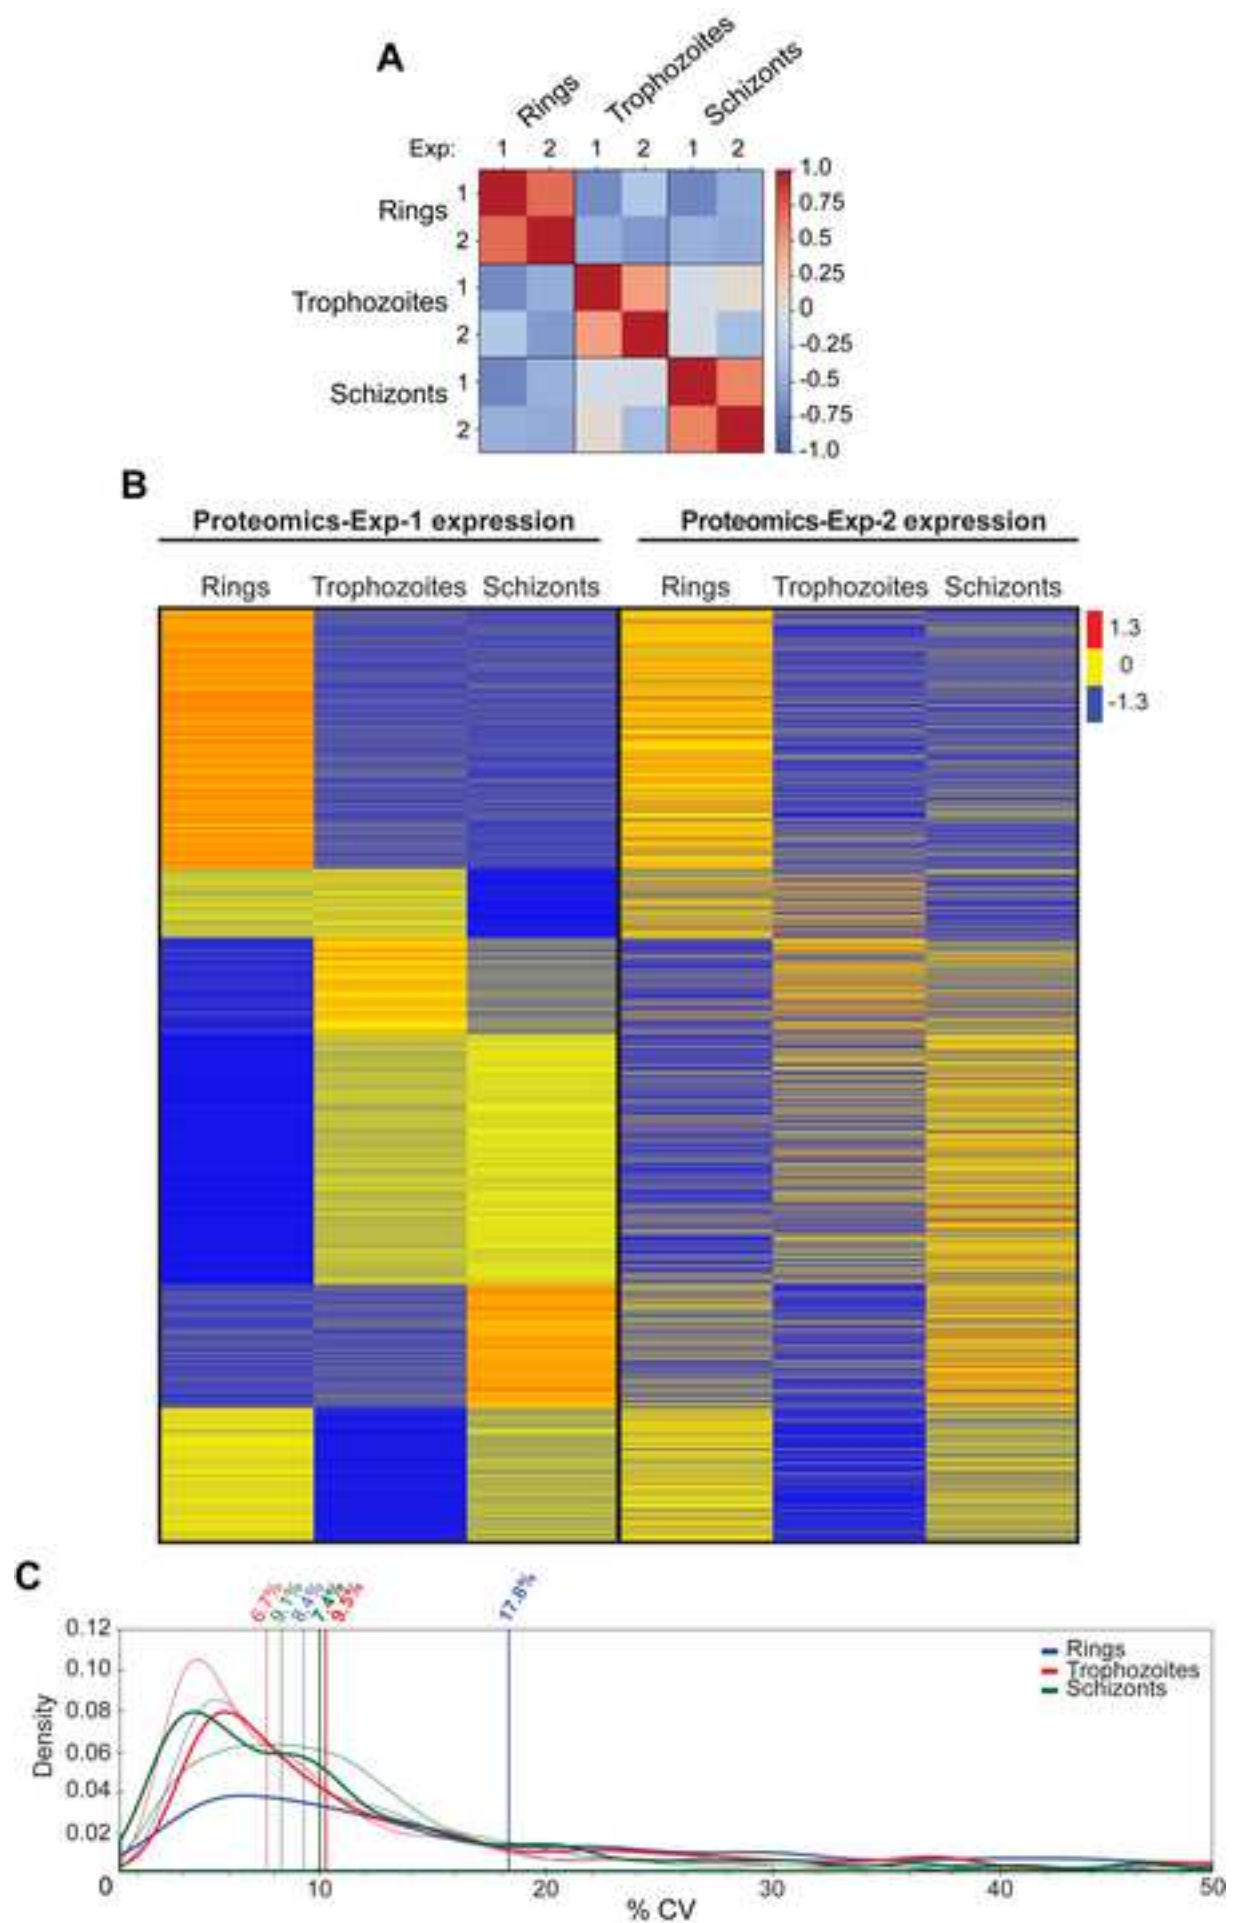



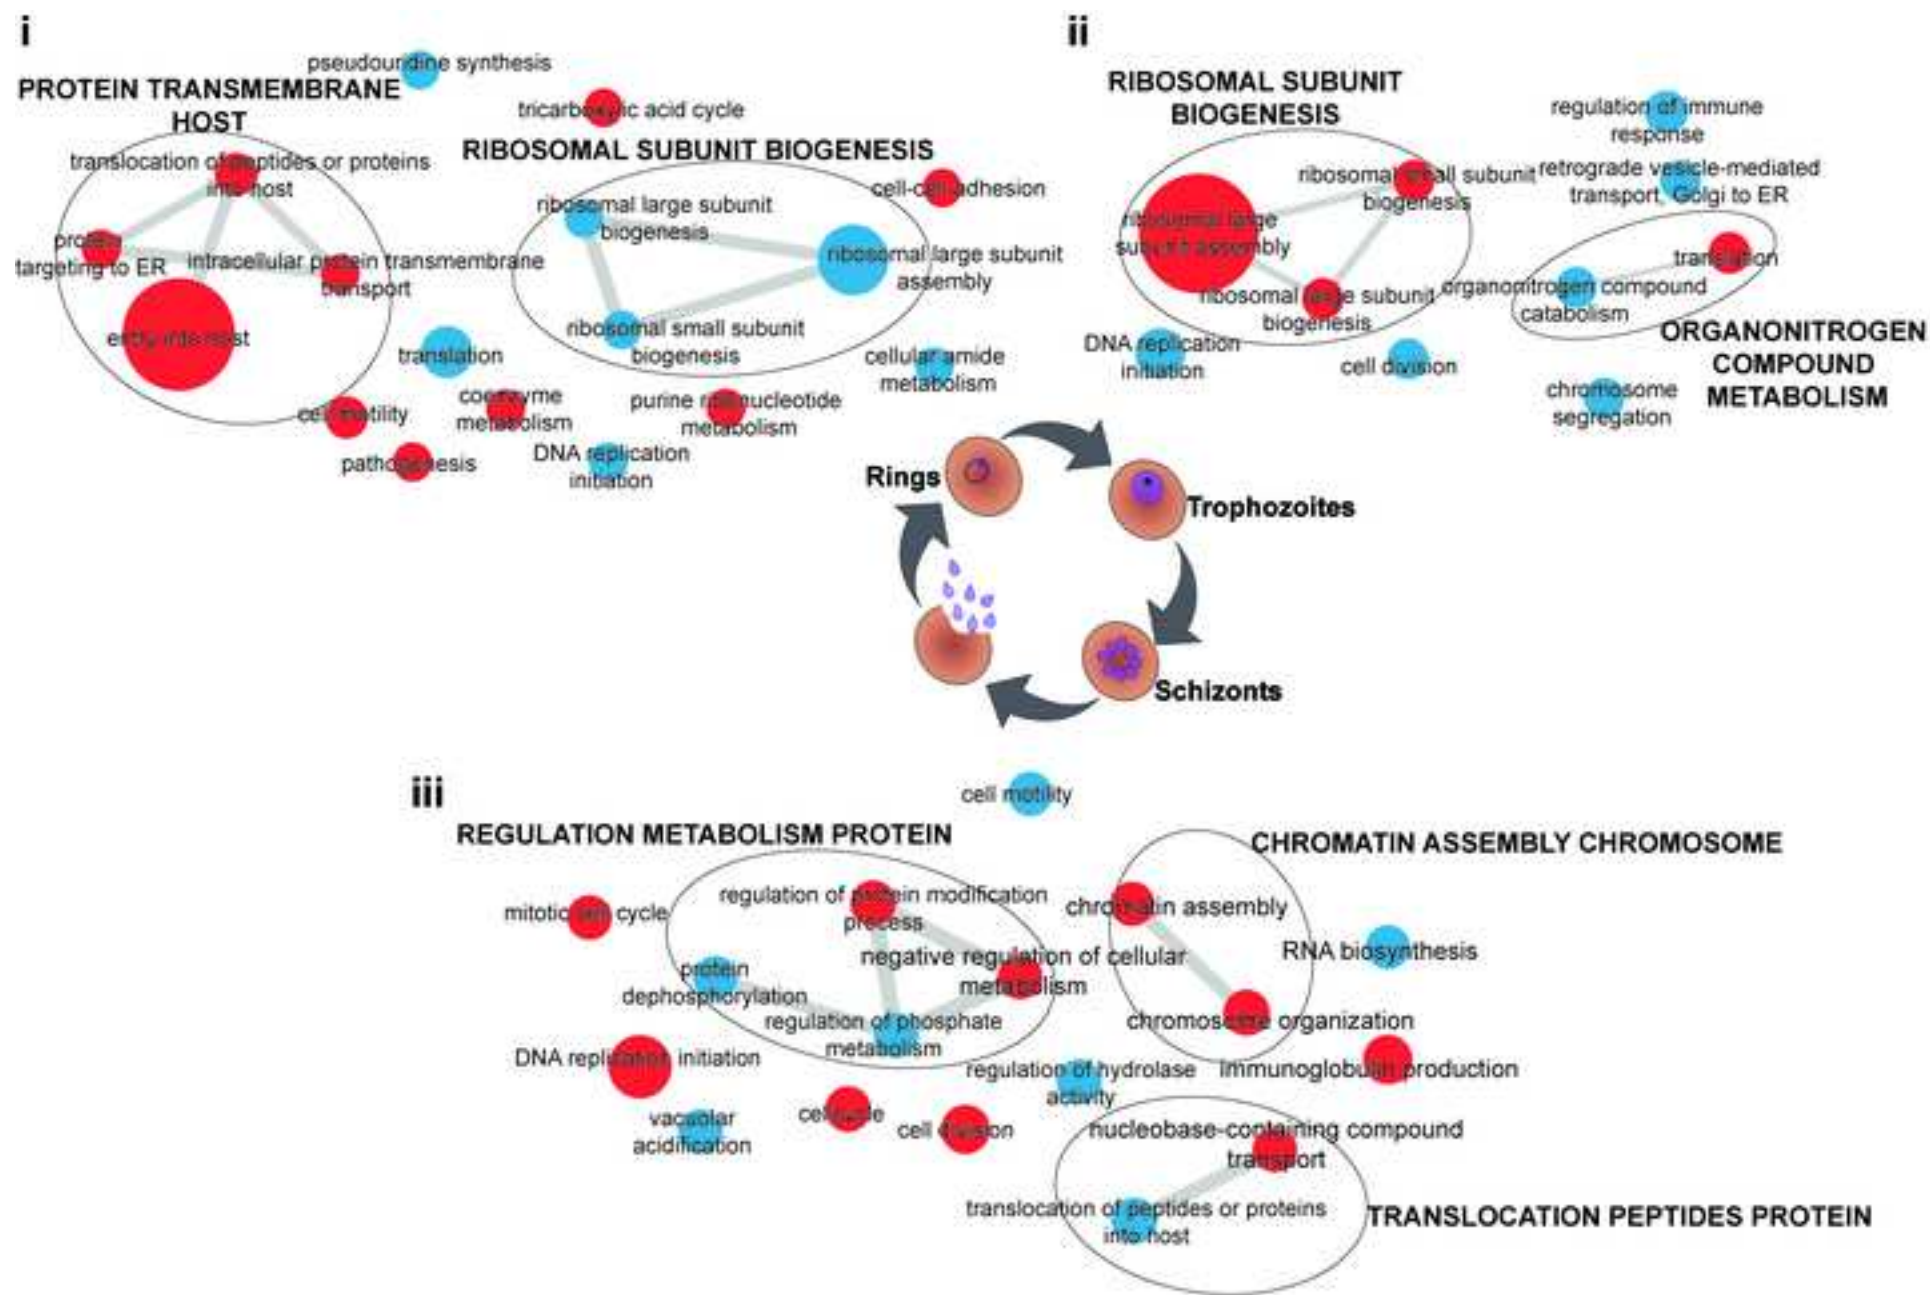

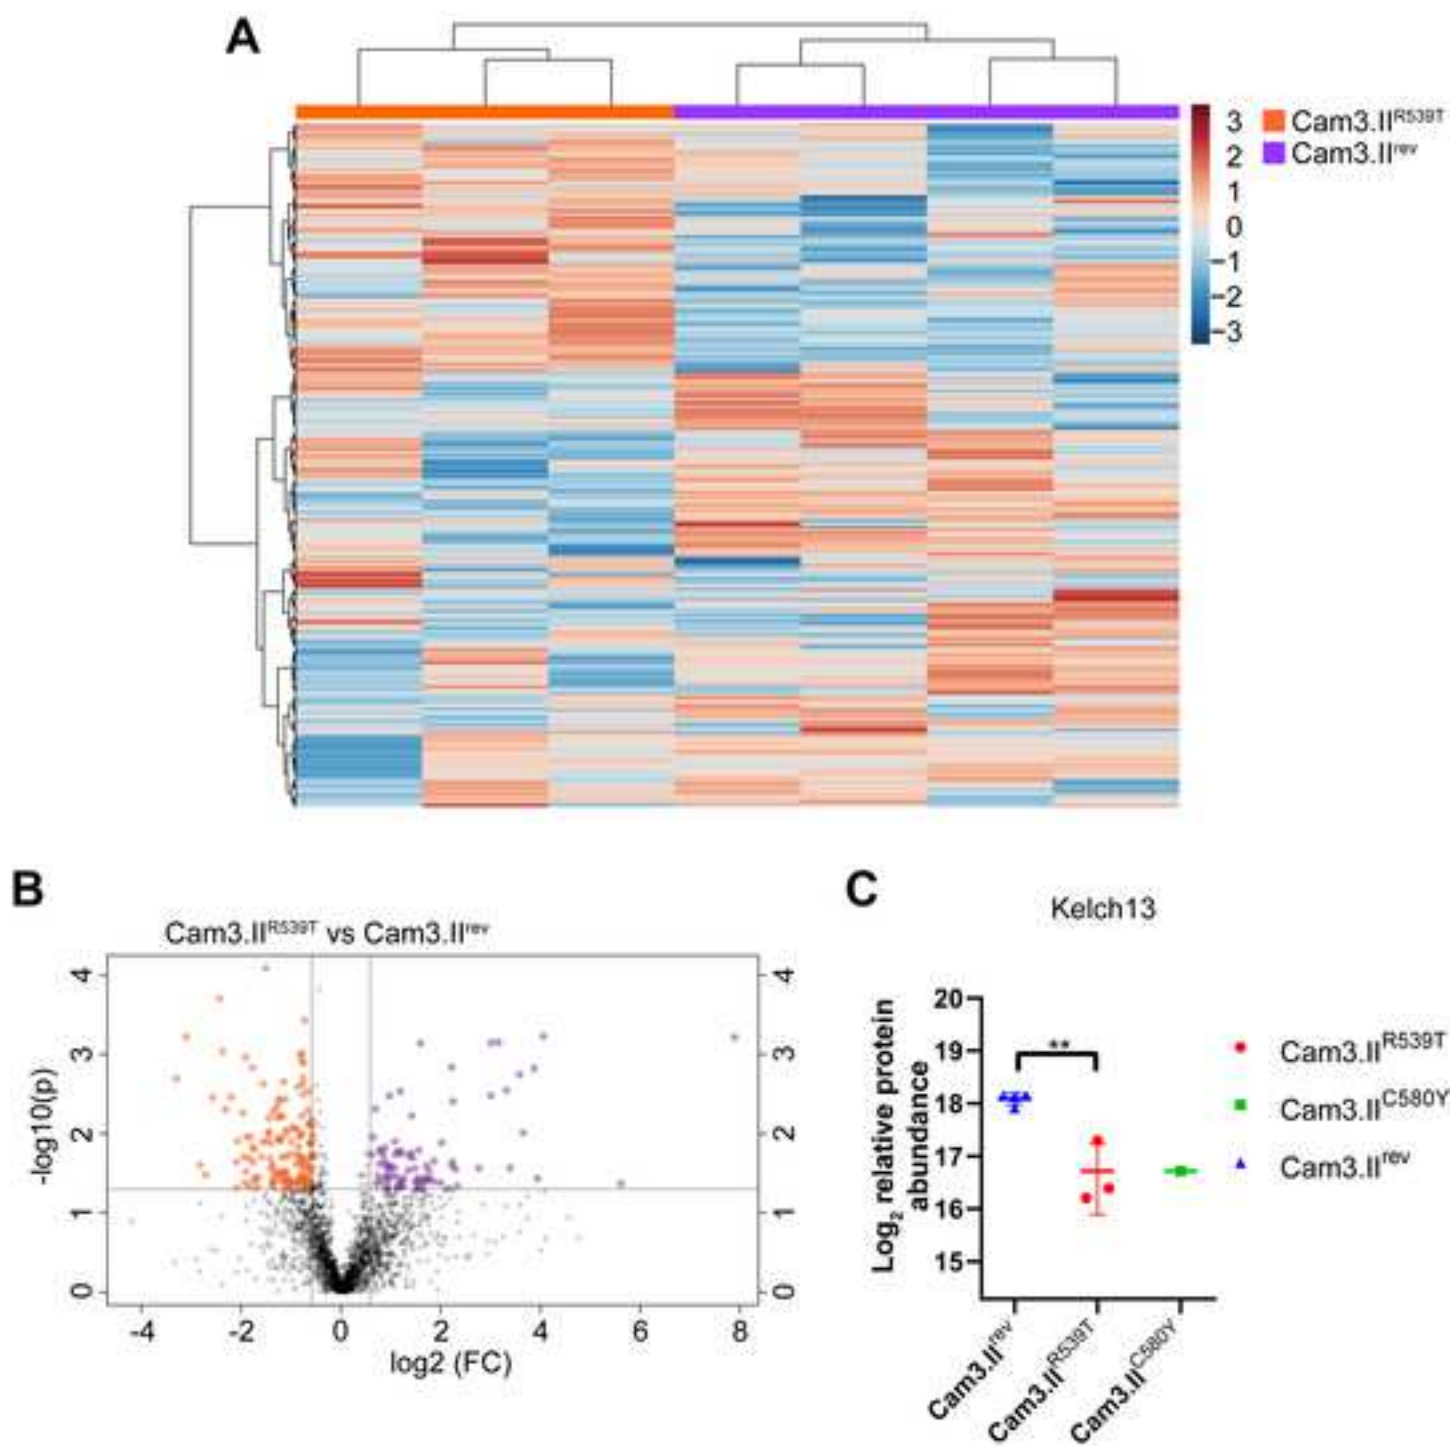

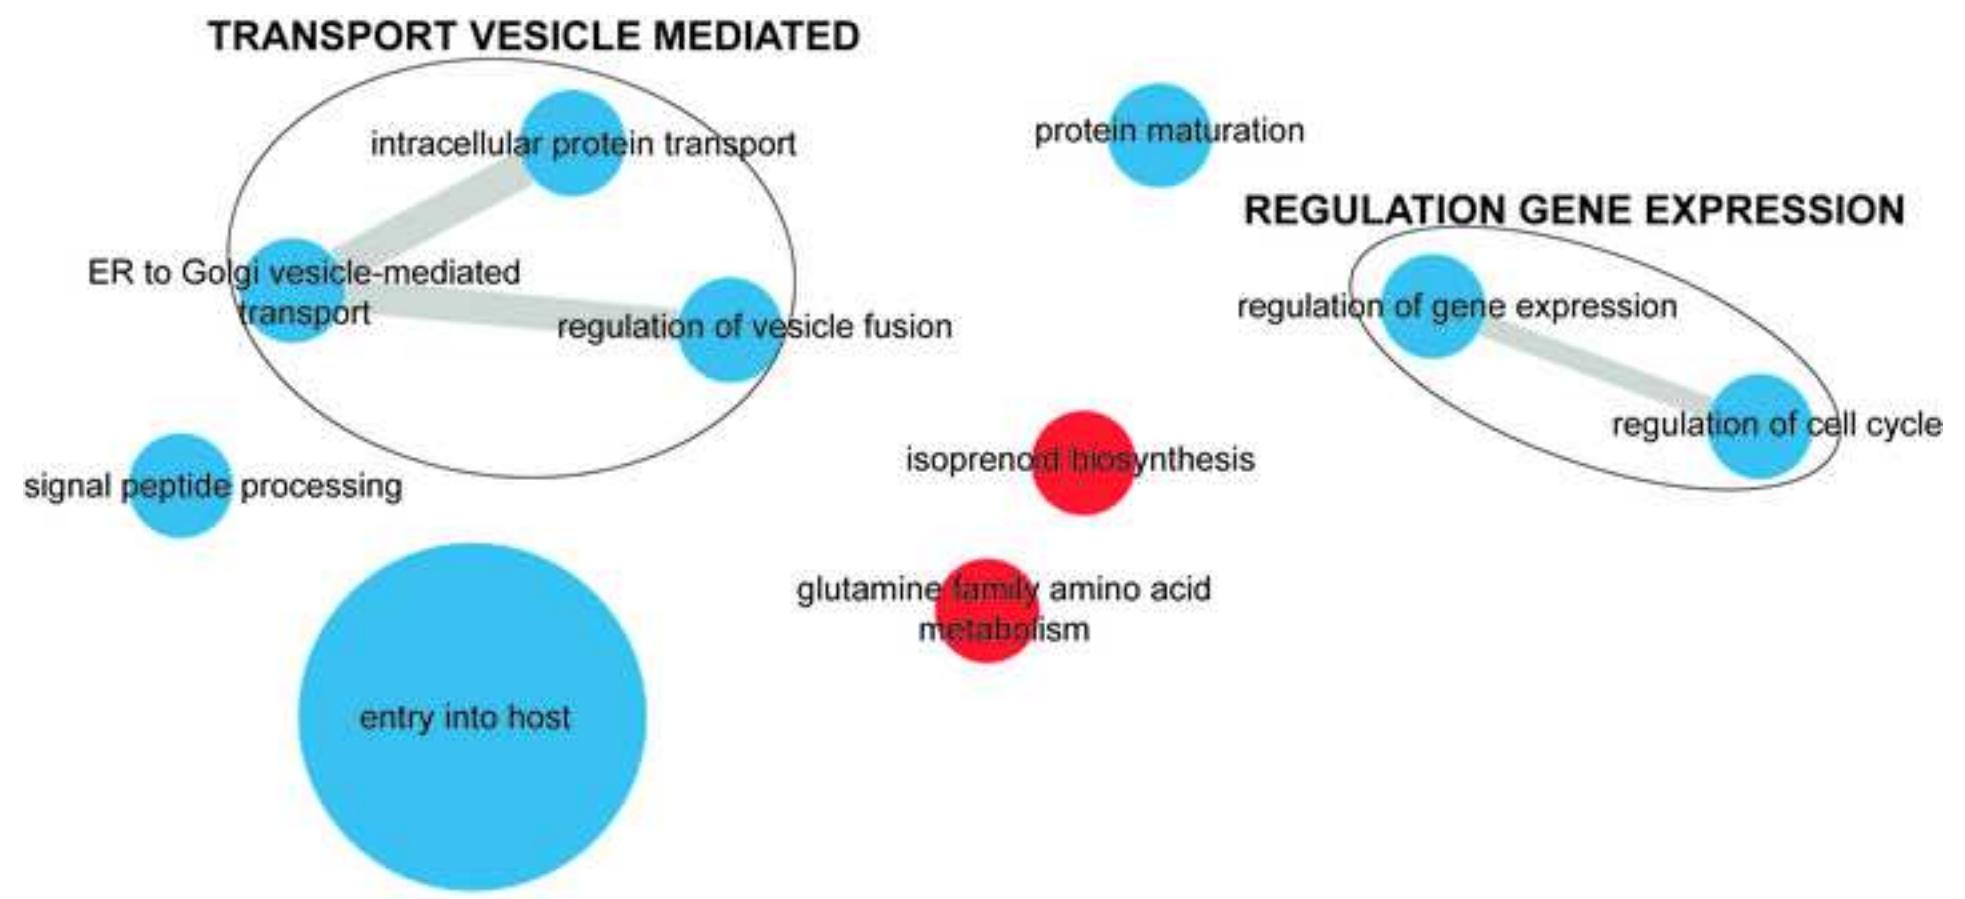



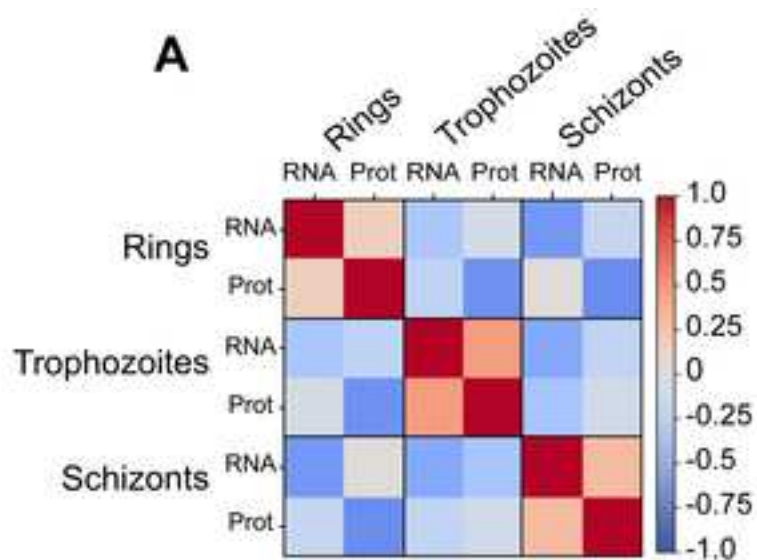

**B**

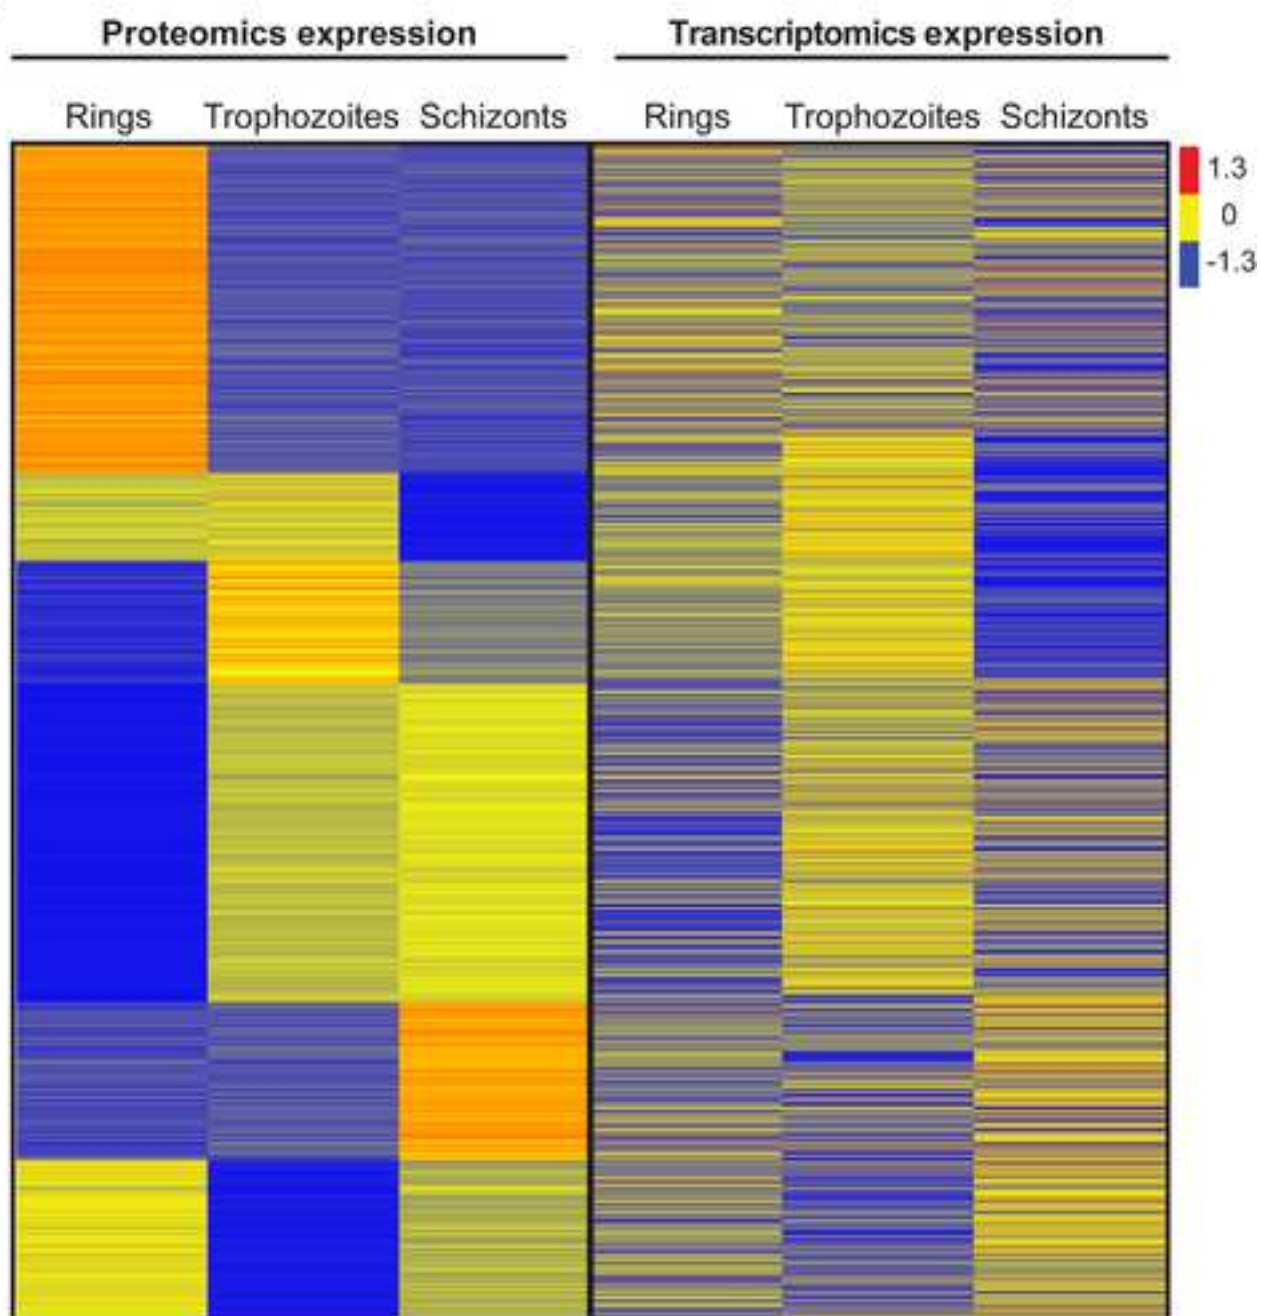

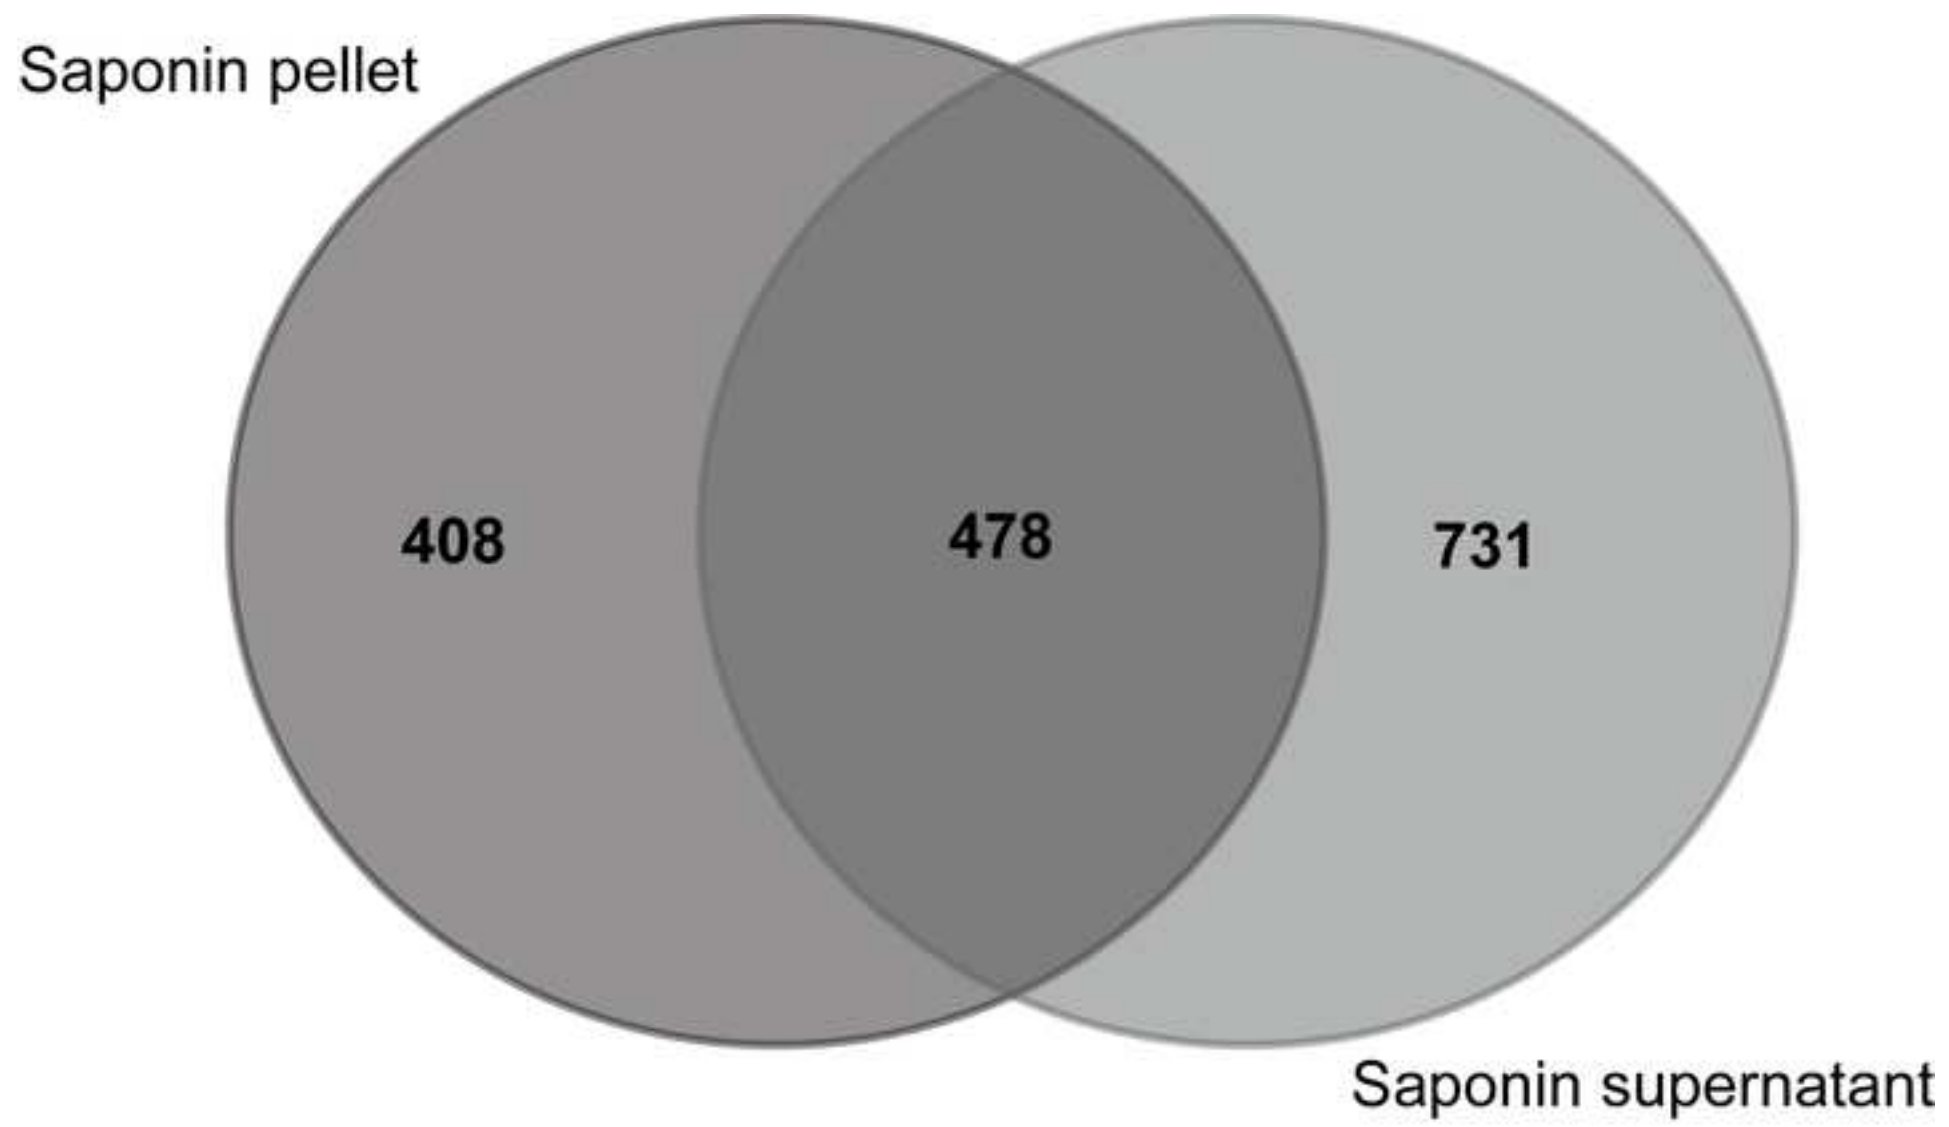

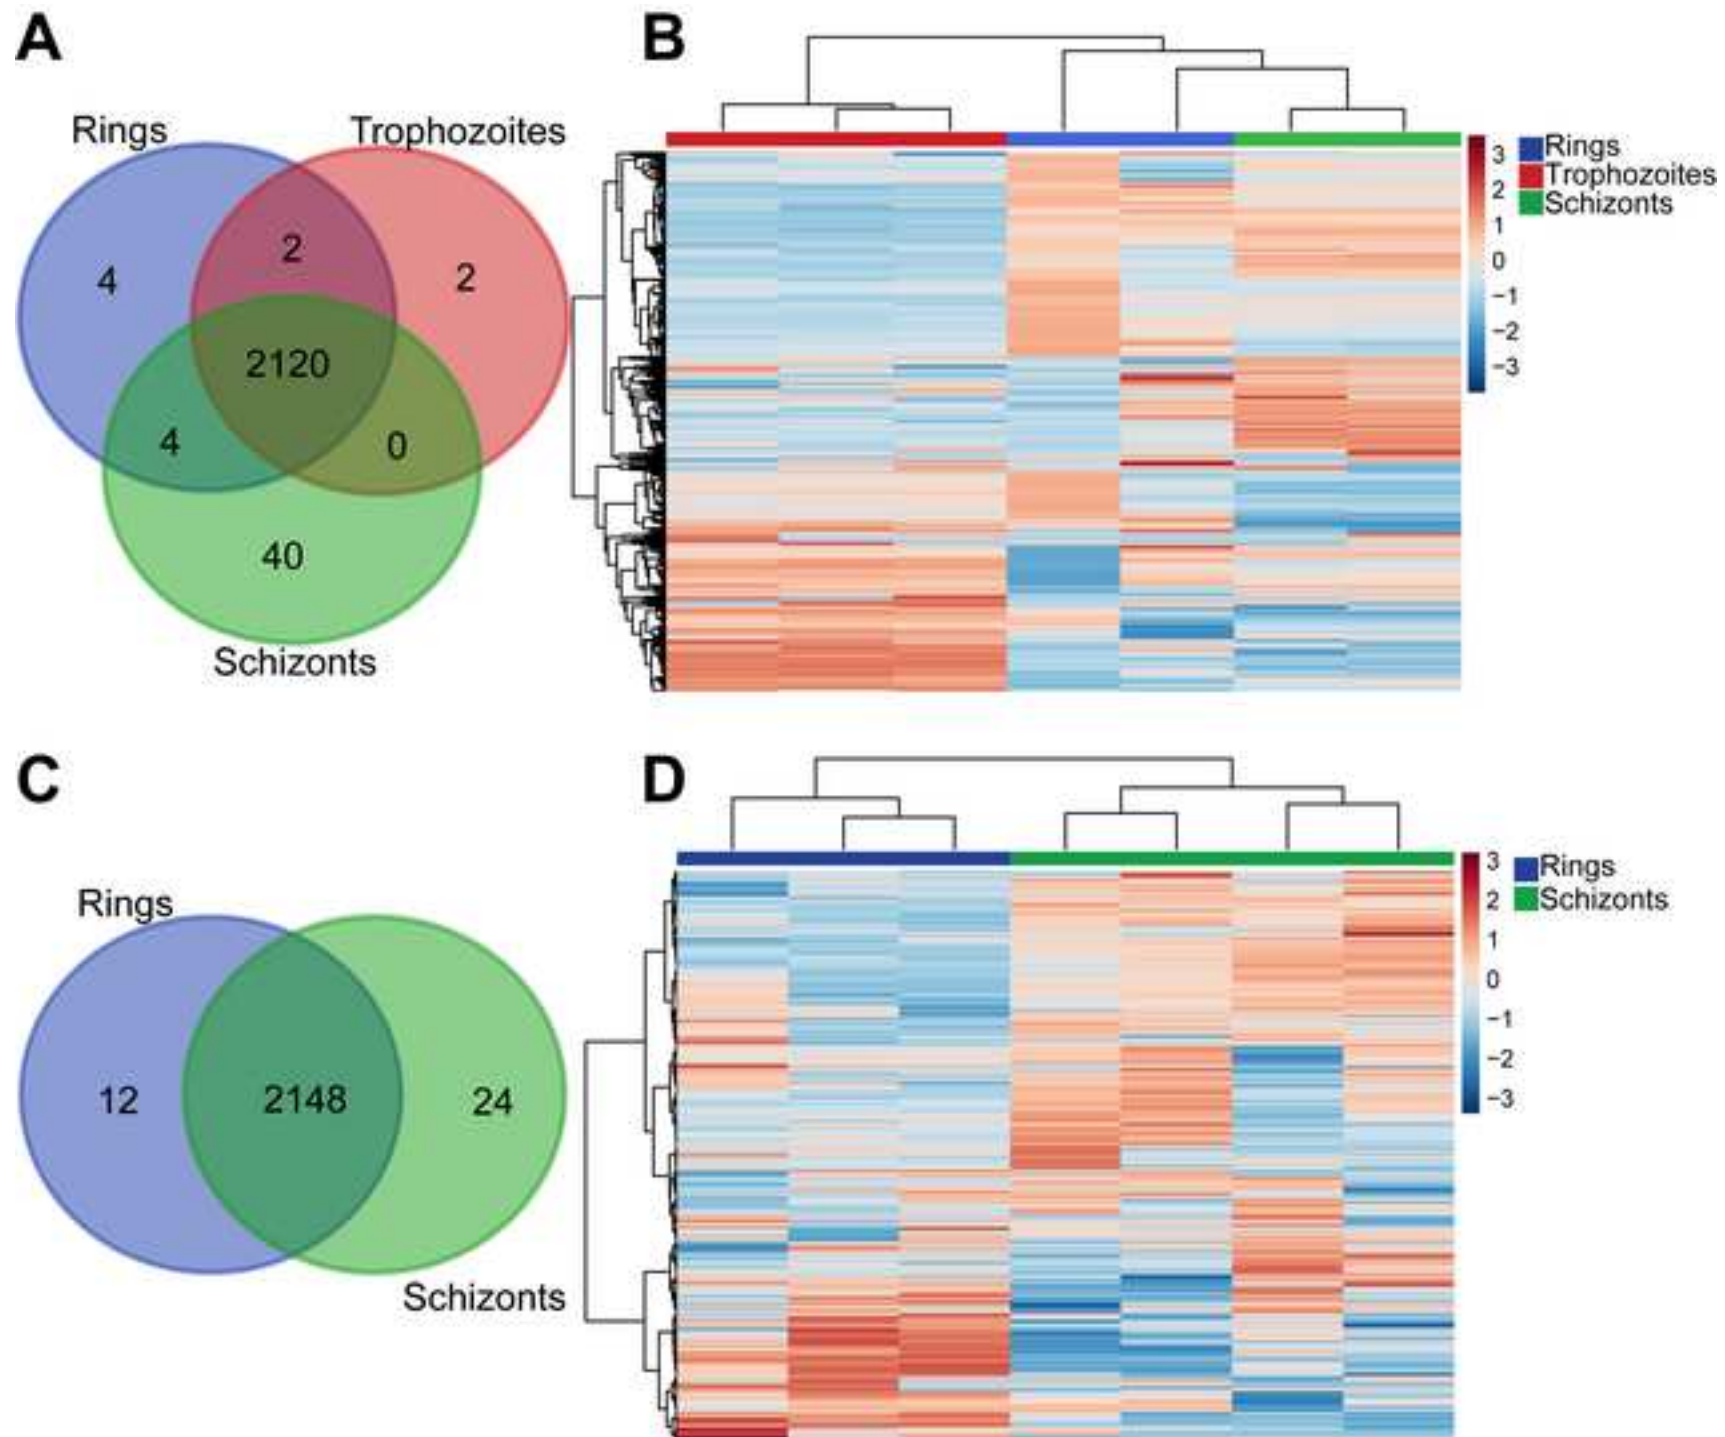

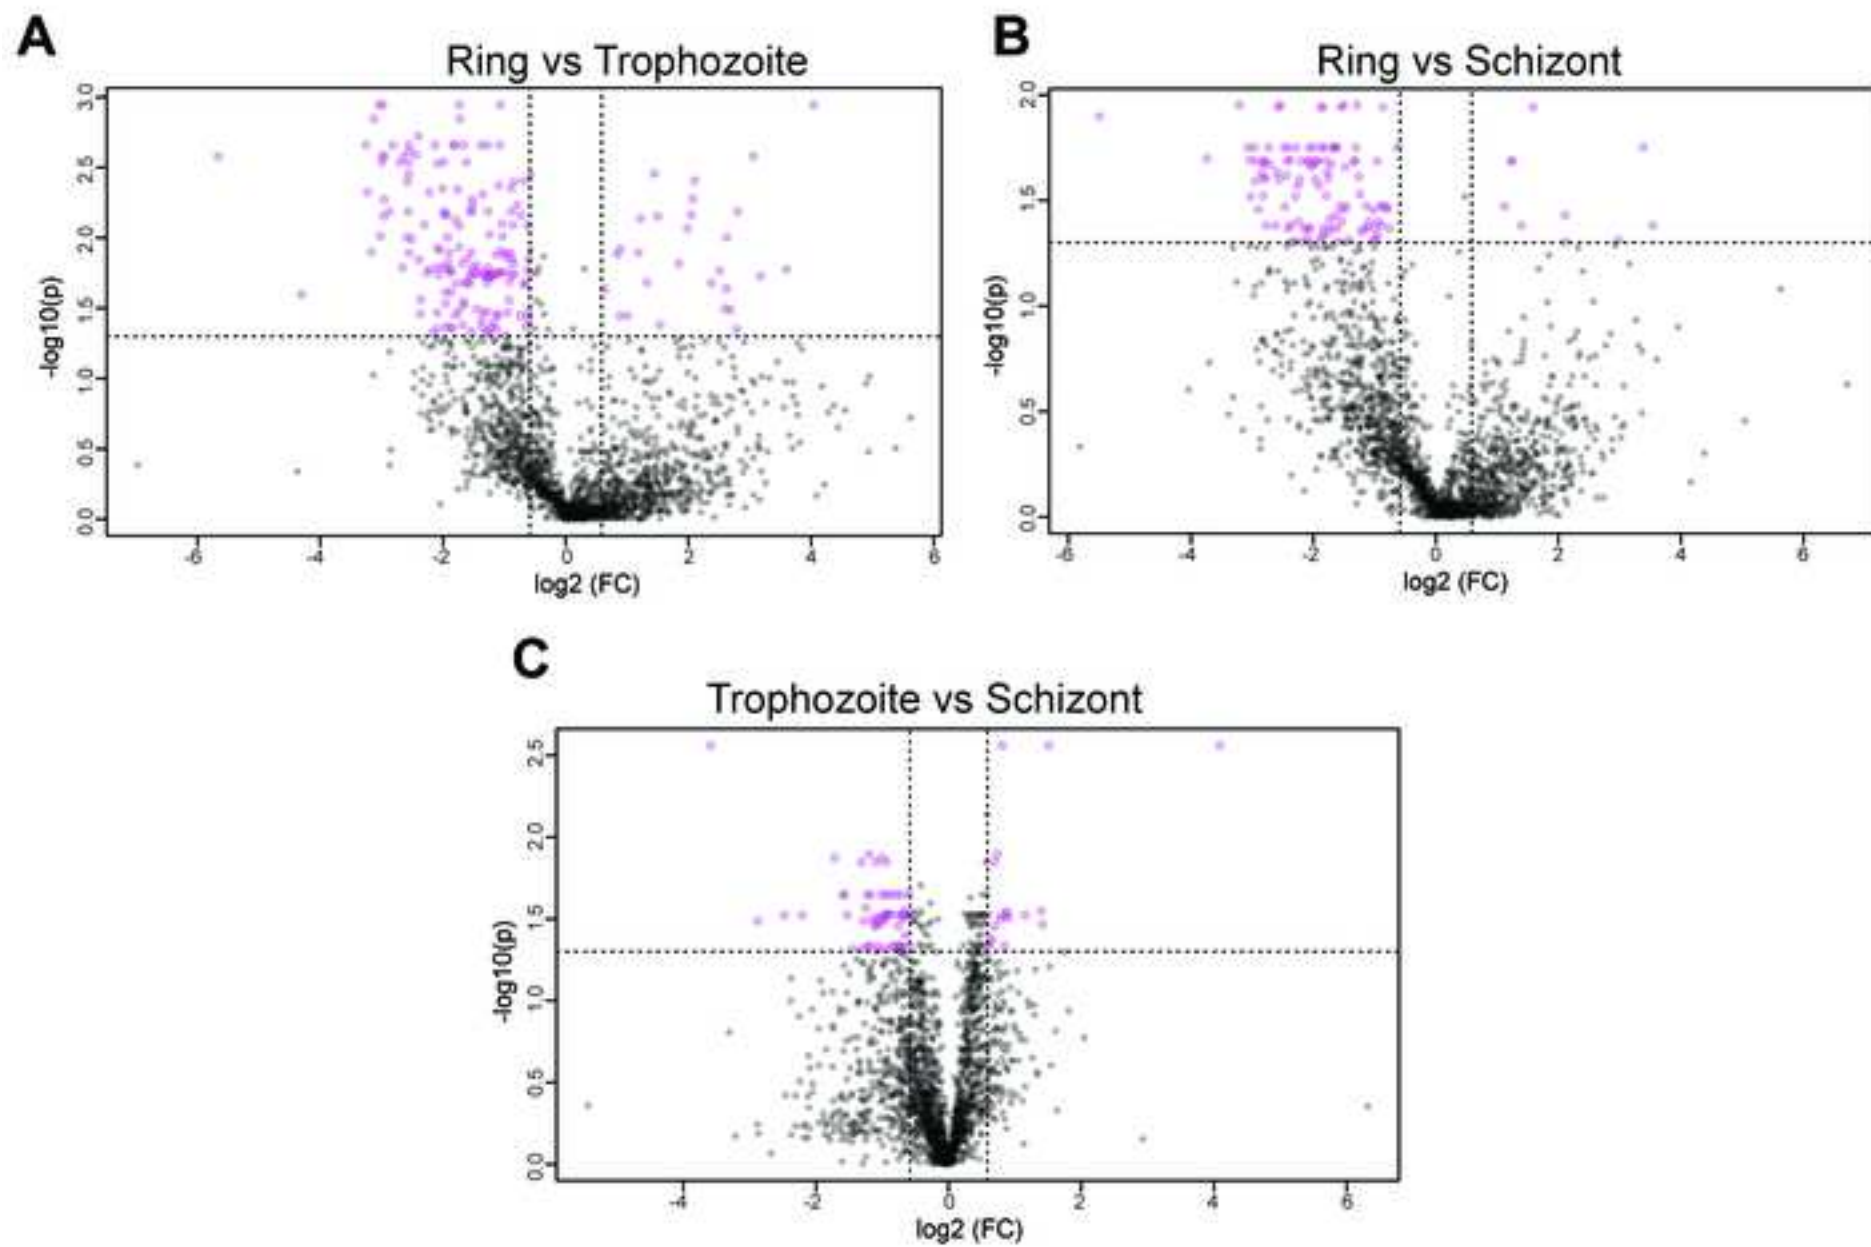

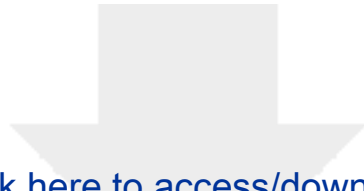

Click here to access/download  
**Supplementary Material**  
Supporting Information.docx

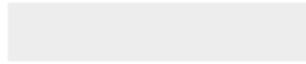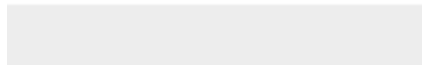



Click here to access/download  
**Supplementary Material**  
Supplementary\_data\_sheet\_1.xlsx





Click here to access/download  
**Supplementary Material**  
Supplementary\_data\_sheet\_2.xlsx





Click here to access/download  
**Supplementary Material**  
Supplementary\_data\_sheet\_3.xlsx







Click here to access/download  
**Supplementary Material**  
Supplementary\_data\_sheet\_4.xlsx

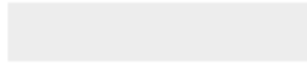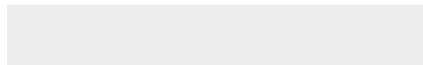



Click here to access/download  
**Supplementary Material**  
Supplementary\_data\_sheet\_5.xlsx





Click here to access/download  
**Supplementary Material**  
Supplementary\_data\_sheet\_6.xlsx





Click here to access/download  
**Supplementary Material**  
Supplementary\_data\_sheet\_7.xlsx





Click here to access/download  
**Supplementary Material**  
Supplementary\_data\_sheet\_8.xlsx



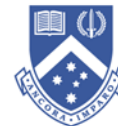

Darren Creek PhD  
Associate Professor  
Monash Institute of Pharmaceutical Sciences

To Dr Laurie Goodman  
Giga Science

18/06/2021

**A new mass spectral library for high-coverage and reproducible analysis of the *Plasmodium falciparum*-infected red blood cell proteome**

Dear Doctor Goodman,

We would like you to consider our manuscript for publication in Giga Science. Our manuscript provides a comprehensive *Plasmodium falciparum*-infected red blood cell spectral library that will provide a pivotal resource for malaria research. This comprehensive library allows the routine measurement of 44,449 peptides from 3,113 parasite and 1,617 red blood cell proteins using a data-independent acquisition (DIA) approach.

Malaria impacts over 200 million people each year, and the majority of malaria mortality is caused by *P. falciparum*, which causes disease during its asexual red blood cell stage of infection. In the absence of an effective vaccine and increasing drug resistance, ongoing fundamental research is critical to provide an in-depth understanding of the parasite proteins involved in disease onset and progression, and how their expression, structure, and function are responsible for disease pathology. Technical advances in proteomics for malaria, such as DIA, are required to fully identify and quantify the entire complement of proteins in the parasite-infected red blood cell. DIA techniques have revolutionised proteomics studies in the biomedical sciences, but have had minimal application to malaria, due to the requirement for large and comprehensive proteomic libraries. To address these gaps, we generated a comprehensive spectral library of the *P. falciparum* reference strain, including all asexual red blood cell stages as well as the cytosolic fractions from uninfected-red blood cells and the infected-red blood cell cytosol.

This manuscript also demonstrates the application of this new spectral library for quantitative analysis of *P. falciparum* proteins. We demonstrated a capacity to quantify 2,063 *P. falciparum* proteins with nearly no missing proteins across three distinct red blood cell stages of infection using the DIA method. Subsequent enrichment analysis highlighted a plethora of stage-specific functional diversity across blood-stage development. We also utilised the spectral library to compare 2,317 *P. falciparum* proteins between drug resistant and sensitive parasites. We identified a number of parasite proteins enriched in specific dysregulated pathways, shedding further light on the mechanism(s) of resistance for the frontline artemisinin antimalarials. This analysis allowed us to confirm that the spectral library generated in this work, accompanied by the DIA methodology, can successfully perform reproducible, specific and accurate quantitative proteomics of *P. falciparum* asexual red blood cell stages and can be used to investigate a wide range of biological questions.

Monash Institute of Pharmaceutical Sciences  
381 Royal Parade  
Parkville VIC 3052

Telephone: (+61 3) 9903 9249 Email: [Darren.creek@monash.edu](mailto:Darren.creek@monash.edu) Web: [www.creek-lab.com](http://www.creek-lab.com)

**Unintended recipient: please notify as soon as possible and destroy all pages received**

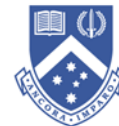

Darren Creek PhD  
Associate Professor  
Monash Institute of Pharmaceutical Sciences

Importantly, our freely accessible library will furnish the research malaria community with a resource to explore future proteome-phenotypic studies with the advantage of robustness, reproducibility and streamlined procedures.

We believe our study will be of interest to the wide-ranging readership of Giga Science, and will become a widely-cited reference dataset and methodology for malaria proteomics studies. We would be grateful if you could consider our manuscript for publication. This manuscript is not currently under consideration by any other journal. All authors have seen and approved the final submitted version of this manuscript

We look forward to hearing from you,

Yours sincerely,

Associate Professor Darren Creek  
NHMRC CDF2 Fellow  
Drug Delivery, Disposition and Dynamics; Monash Institute of Pharmaceutical Sciences  
Director (Parkville Node), Monash Proteomics and Metabolomics Facility  
Faculty of Pharmacy and Pharmaceutical Sciences, Monash University (Parkville campus)  
Room 3.206b, 399 Royal Parade, Parkville, Victoria, 3052, Australia  
Email: darren.creek@monash.edu, Phone: +61 (0) 3 9903 9249, Fax: +61 (0) 3 9903 9583  
[www.creek-lab.com](http://www.creek-lab.com)

Doctor Ghizal Siddiqui  
Postdoctoral Research Scientist  
Proteomics lead at Monash Proteomics and Metabolomics Facility (Parkville Node)  
Monash Institute of Pharmaceutical Sciences  
Monash University, Parkville Campus  
381 Royal Parade, Parkville  
Victoria 3052, Australia  
Email: [ghizal.siddiqui@monash.edu](mailto:ghizal.siddiqui@monash.edu), Phone: +61 (0) 3 9903 9249.
